# Supplementary material
Source: PubMed Central journal article supplement (PMC5720685)
Supplement: NIHMS922087-supplement-NMR_spectra.pdf [file NIHMS922087-supplement-NMR_spectra.pdf]

# Supporting Information

## Pyrazolopyrimidines as Potent Stimulators for Transient Receptor Potential Canonical 3/6/7 Channels

Chunrong Qu<sup>†,✳</sup>, Mingmin Ding<sup>†,✳</sup>, Yingmin Zhu<sup>‡,✳</sup>, Yungang Lu<sup>†</sup>, Juan Du<sup>§</sup>, Melissa Miller<sup>//, &</sup>, Jinbin Tian<sup>†</sup>, Jinmei Zhu<sup>†</sup>, Jian Xu<sup>⊥, #</sup>, Meng Wen<sup>†</sup>, AGA Er-Bu<sup>∇</sup>, Jule Wang<sup>∇</sup>, Yuling Xiao<sup>†</sup>, Meng Wu<sup>//, &</sup>, Owen B. McManus<sup>//, &</sup>, Min Li<sup>//, &</sup>, Jilin Wu<sup>#, ¶</sup>, Huai-Rong Luo<sup>ψ, &</sup>, Zhengyu Cao<sup>⊥</sup>, Bing Shen<sup>§</sup>, Hongbo Wang<sup>ξ, \*</sup>, Michael X. Zhu<sup>‡, #, \*</sup>, and Xuechuan Hong<sup>†, ∇, II, \*</sup>

<sup>†</sup>State Key Laboratory of Virology, Key Laboratory of Combinatorial Biosynthesis and Drug Discovery (MOE) and Hubei Province Engineering and Technology Research Center for Fluorinated Pharmaceuticals, Wuhan University School of Pharmaceutical Sciences, Wuhan, Hubei Province 430071, China.

<sup>‡</sup>Department of Integrative Biology and Pharmacology, McGovern Medical School, The University of Texas Health Science Center at Houston, Houston, TX, 77030, USA

<sup>§</sup>School of Basic Medical Sciences, Anhui Medical University, Hefei, Anhui Province 230032, China

<sup>//</sup>Department of Neuroscience, High Throughput Biology Center and Johns Hopkins Ion Channel Center, Johns Hopkins University School of Medicine, Baltimore, Maryland, 21205, USA

<sup>⊥</sup>State Key Laboratory of Natural Medicines, Jiangsu Provincial Key laboratory for TCM Evaluation and Translational Development, China Pharmaceutical University, Nanjing, Jiangsu Province 211198, China

<sup>#</sup>The International Scientist Working Station of Neuropharmacology, Shanghai Institute of Materia Medica, Chinese Academy of Sciences, Shanghai, 201203, China

<sup>¶</sup>University of Chinese Academy of Sciences, Beijing, 100049, China

<sup>∇</sup>Medical College, Tibet University, Lasa, Tibet 850000, China

<sup>ψ</sup>Key Laboratory of Phytochemistry and Plant Resources in West China, Kunming Institute of Botany, Chinese Academy of Sciences, Kunming, Yunnan Province 650201, China

<sup>ξ</sup>School of Pharmacy, Key Laboratory of Molecular Pharmacology and Drug Evaluation (Yantai University), Ministry of Education, Yantai University, Yantai, Shangdong Province 264005, P.R. China

## Table of Contents

|                                                                                                                          |     |
|--------------------------------------------------------------------------------------------------------------------------|-----|
| PART 1. General methods and <sup>1</sup> H NMR data of <b>6a-6c</b> , <b>7a-7b</b> , <b>8a-8d</b> , <b>11a-11c</b> ..... | S2  |
| PART 2. <sup>1</sup> H NMR and <sup>13</sup> C NMR data of <b>4a-4p</b> .....                                            | S10 |
| PART 3. Reversed Phase HPLC results of <b>4a-4p</b> .....                                                                | S26 |

## **PART 1. General methods and <sup>1</sup>H NMR data of 6a-6c, 7a-7b, 8a-8d, 11a-11c**

**General Methods.** Unless other noted, all reagents and solvents obtained were purchased from commercial suppliers and used without further purification. Melting points were determined on a Yuhua X-5 melting point apparatus. All reactions were performed under an argon atmosphere unless otherwise specified. Reaction progress was monitored using analytical thin-layer chromatography (TLC). <sup>1</sup>H and <sup>13</sup>C NMR spectra were recorded on a Bruker AV400 spectrometer (400 MHz, <sup>1</sup>H NMR; 101 MHz, <sup>13</sup>C NMR) at room temperature (rt). NMR spectra were calibrated to the solvent signals of CDCl<sub>3</sub> (δ 7.26 and 77.16 ppm), CD<sub>3</sub>OD (δ 3.31 and 49.00ppm), or DMSO-*d*<sub>6</sub> (δ 2.50 and 39.52 ppm). The chemical shifts are provided in ppm, and the coupling constants, in Hz. The following abbreviations for multiplicities are used: s, singlet; d, doublet; dd, double doublet; ddd, three doublet; t, triplet; dt, double triplet; q, quadruplet; m, multiplet; and br, broad. High-resolution MS was carried out with a Thermo LTQ XL Orbitrap instrument. The purity of all compounds for biological testing was determined by normal and reversed phase HPLC analysis, confirming >95% purity.

### <sup>1</sup>H NMR for 6a

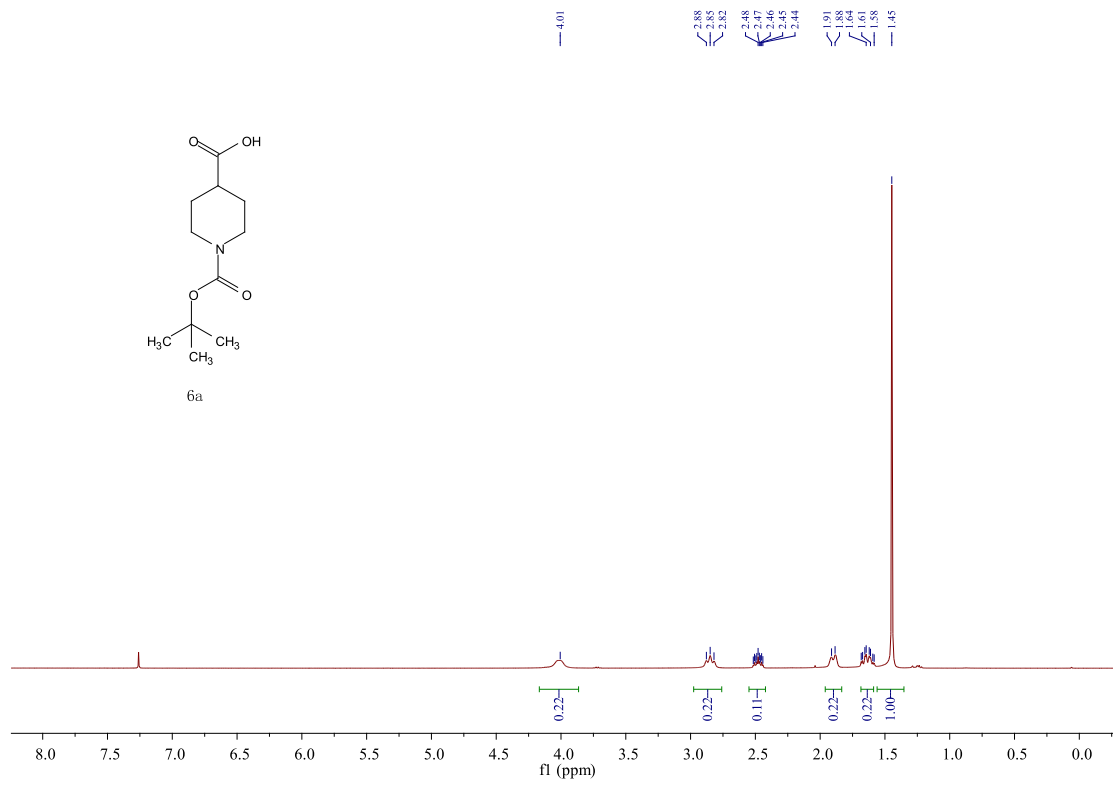

### <sup>1</sup>H NMR for 6b

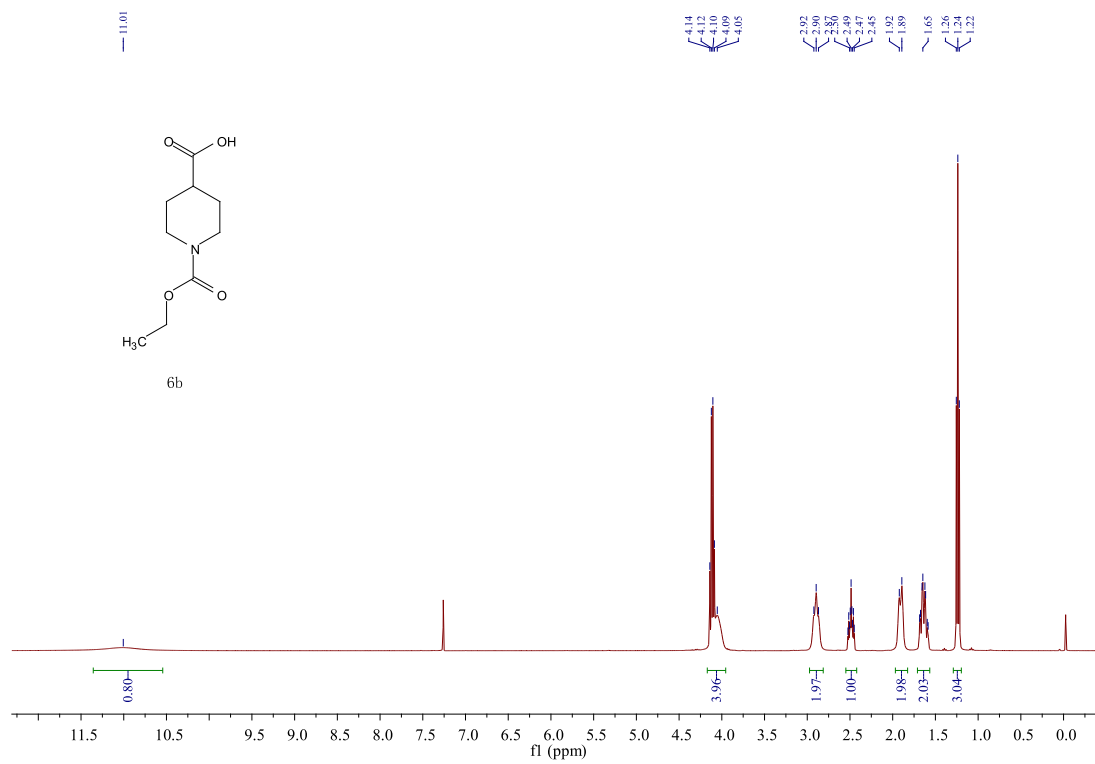

### <sup>1</sup>H NMR for 6c

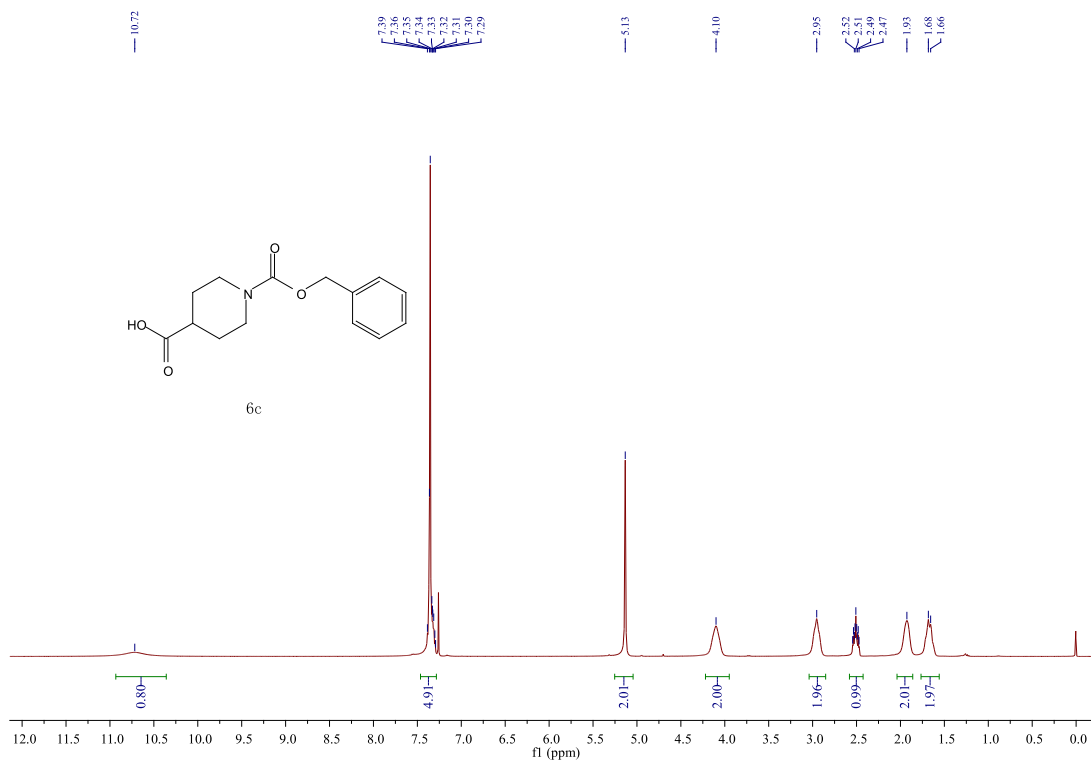

### <sup>1</sup>H NMR for 7a

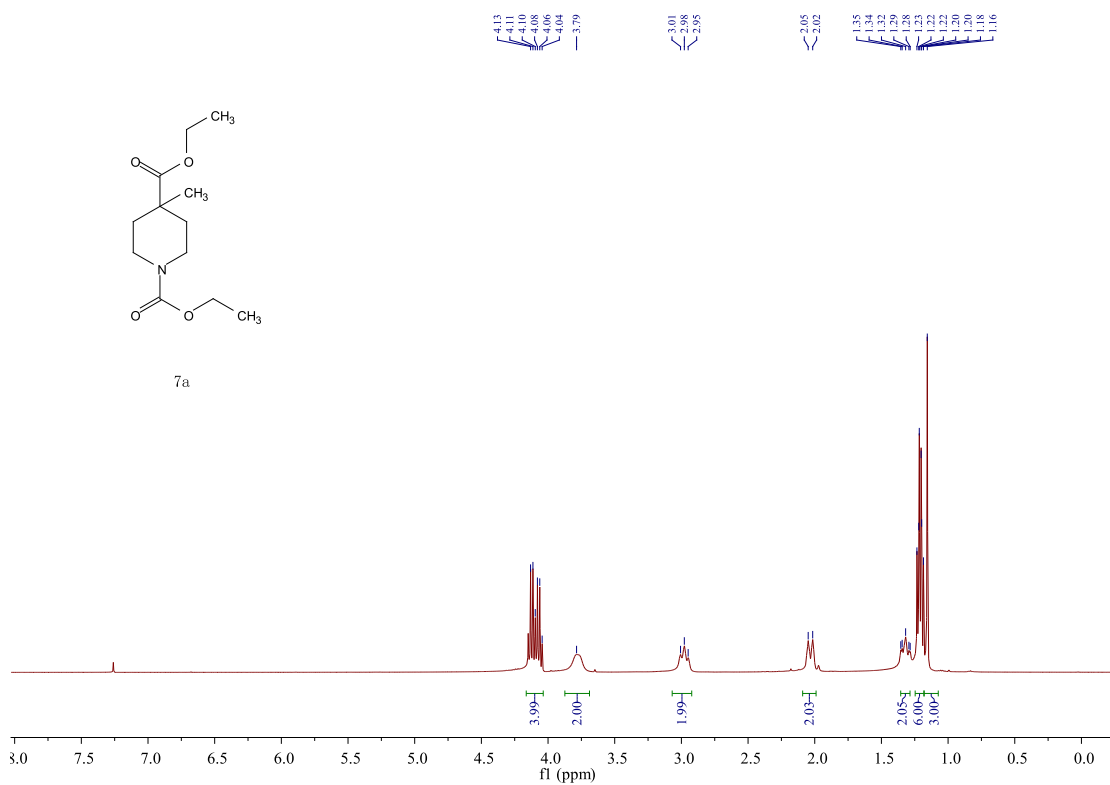

# <sup>1</sup>H NMR for 7b

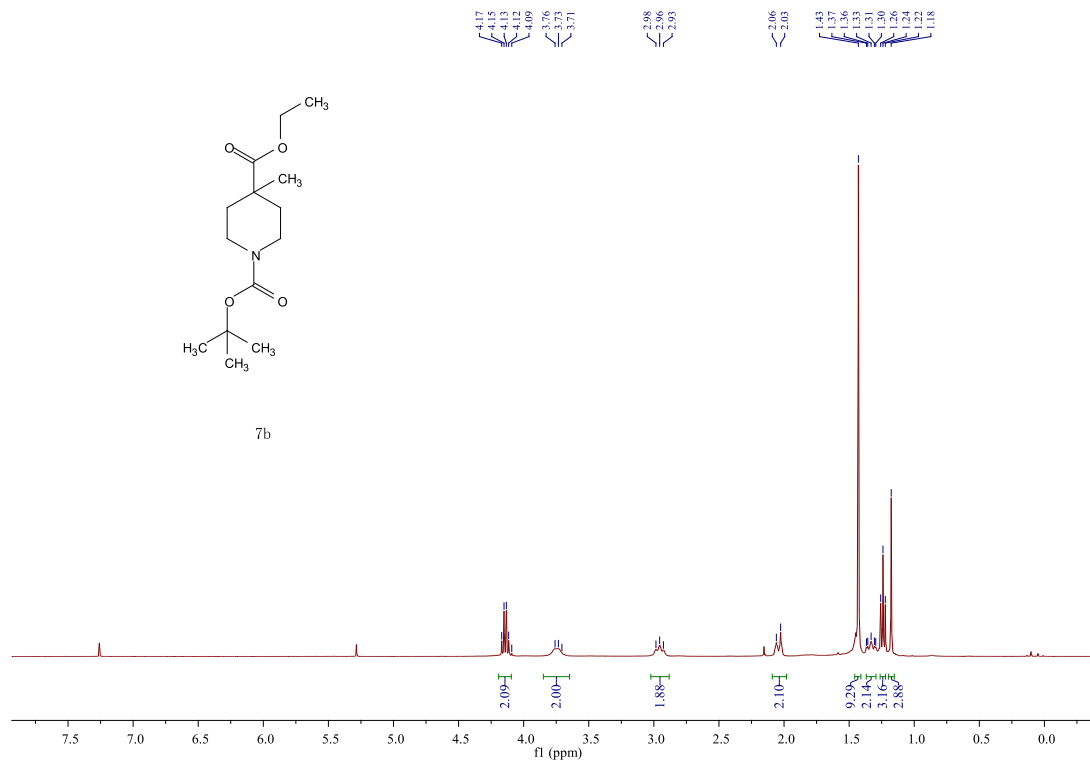

# <sup>1</sup>H NMR for 8a

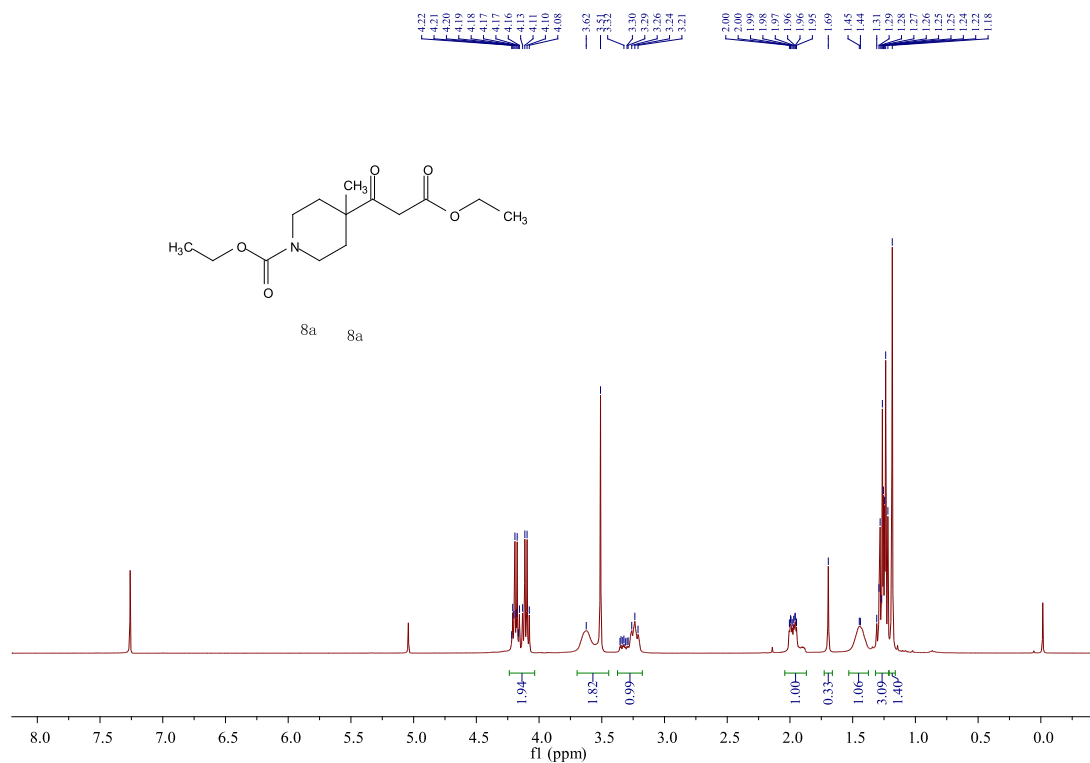

### <sup>1</sup>H NMR for 8b

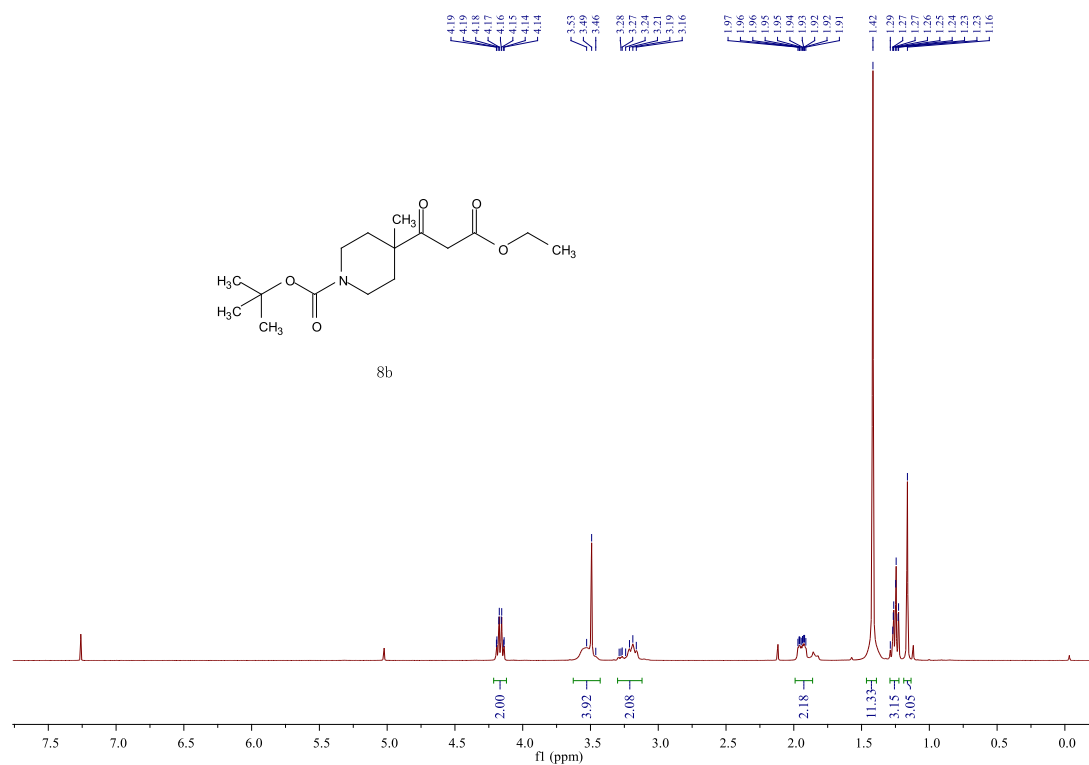

### <sup>1</sup>H NMR for 8c

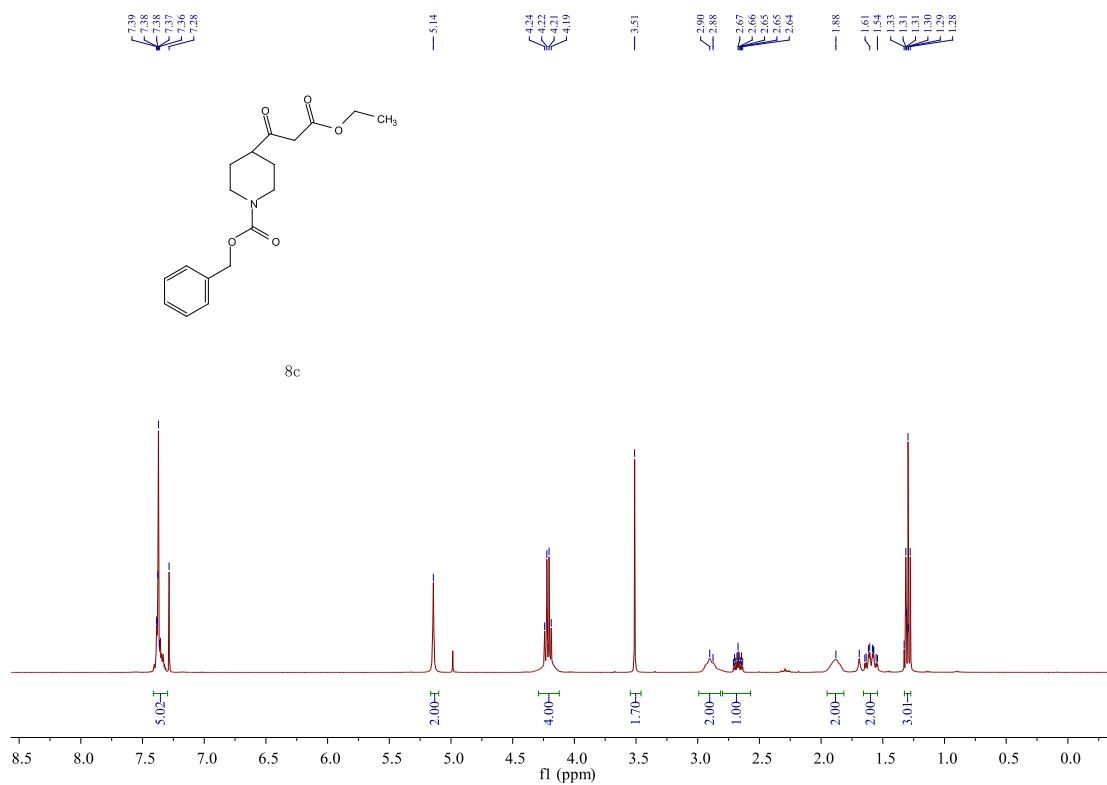

# <sup>1</sup>H NMR for 8d

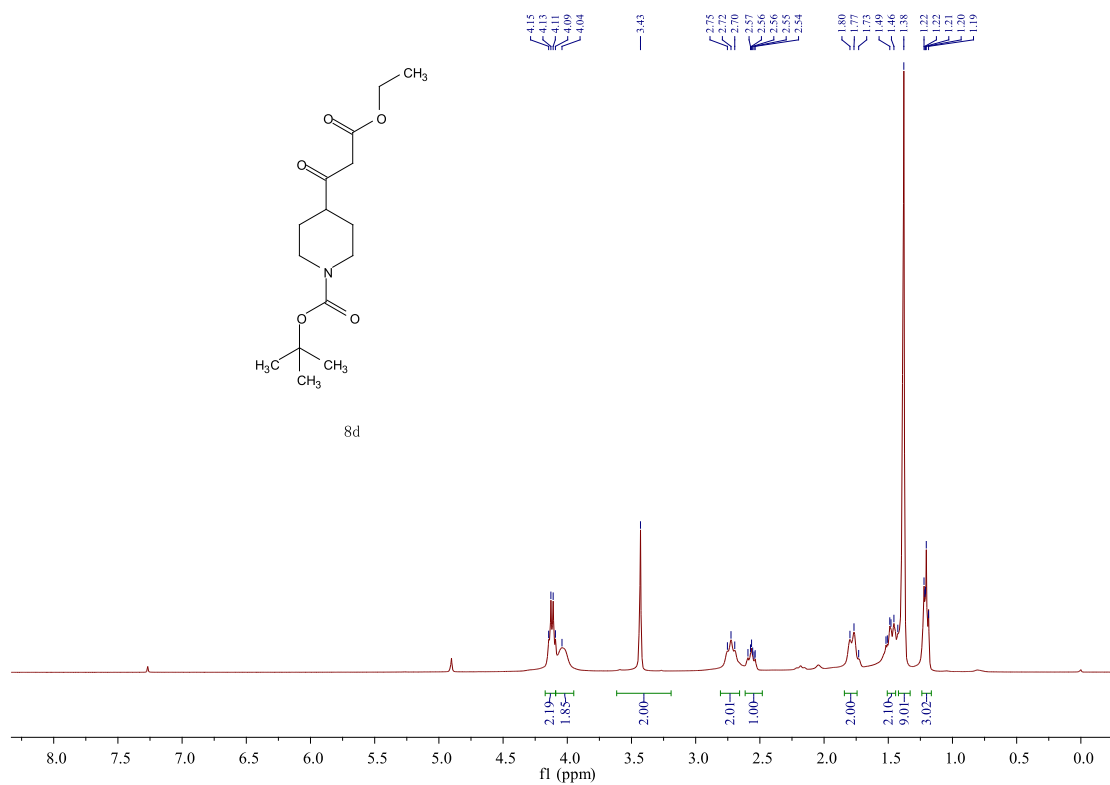

# <sup>1</sup>H NMR for 11a

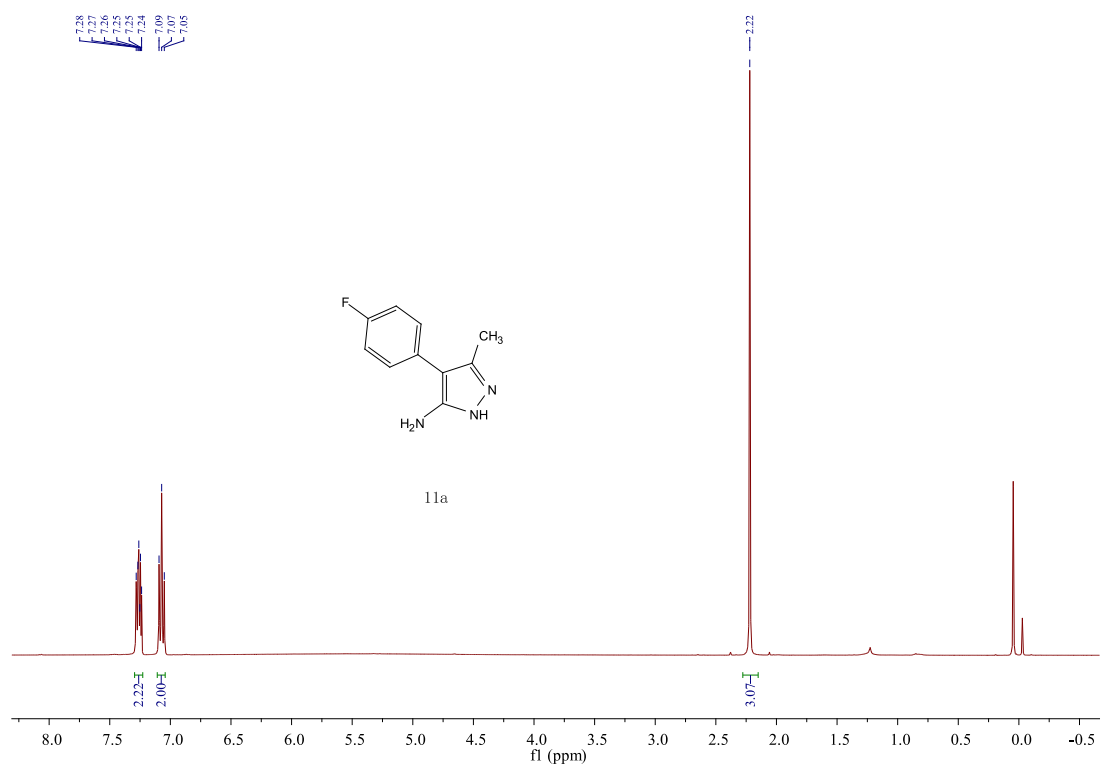

### <sup>1</sup>H NMR for 11b

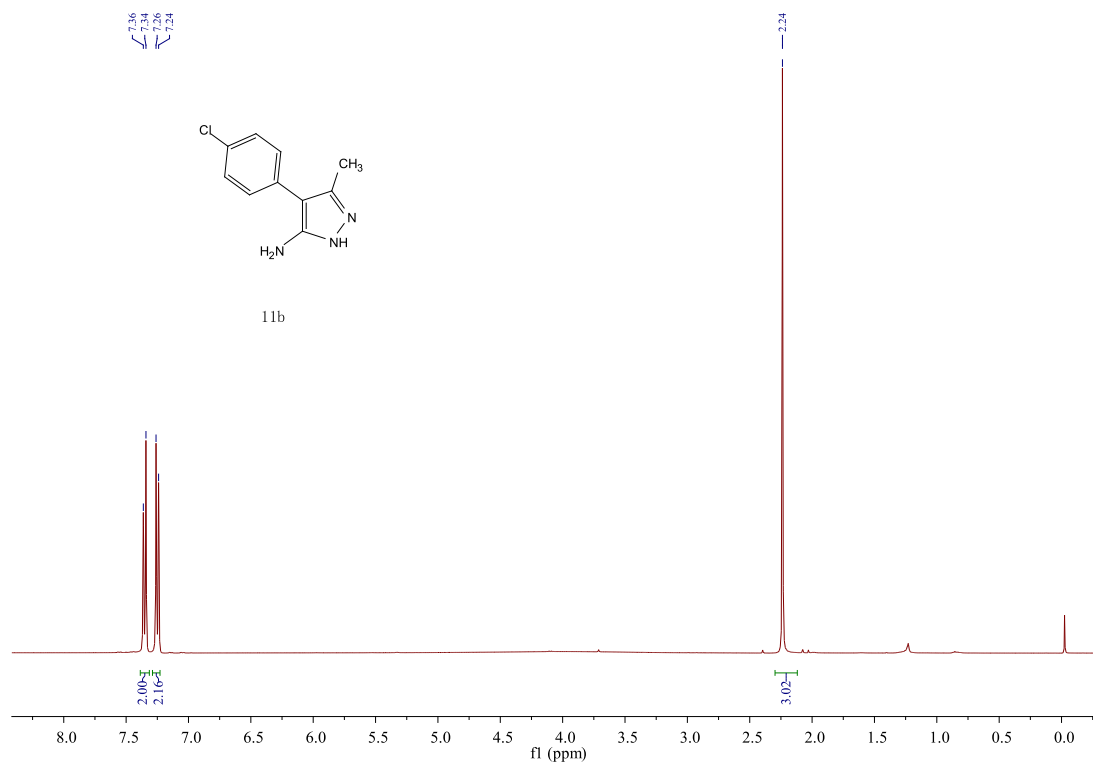

### <sup>1</sup>H NMR for 11c

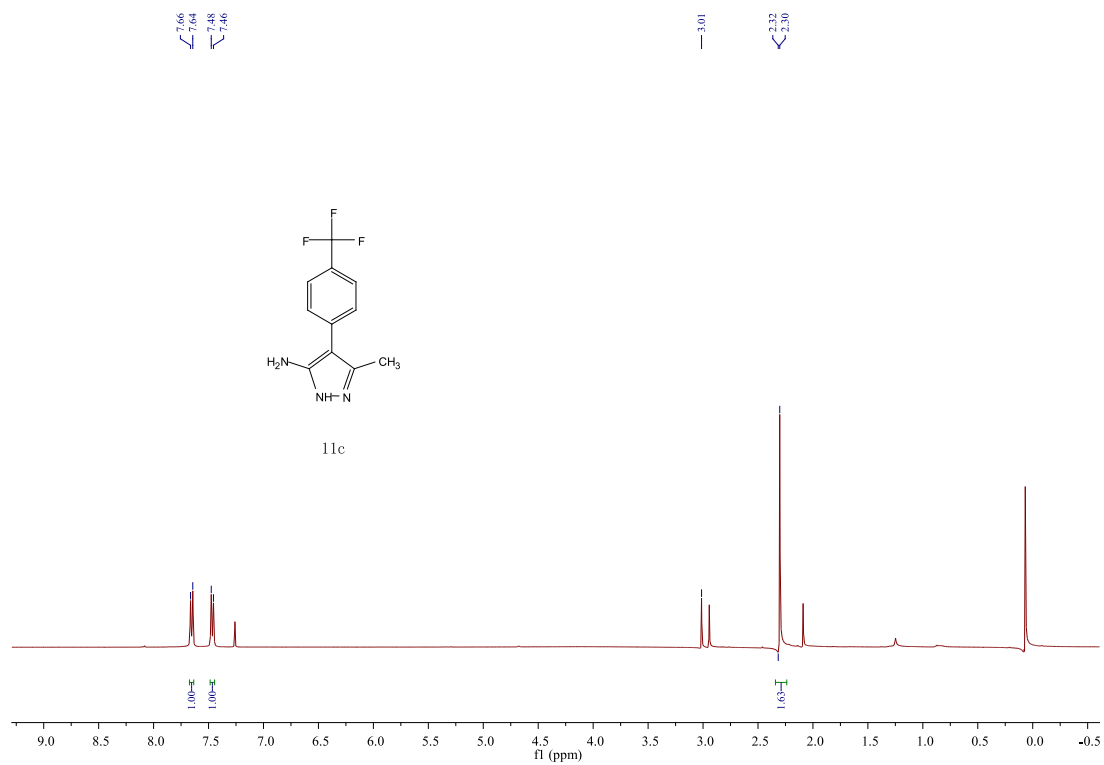



# <sup>1</sup>H NMR for 11d

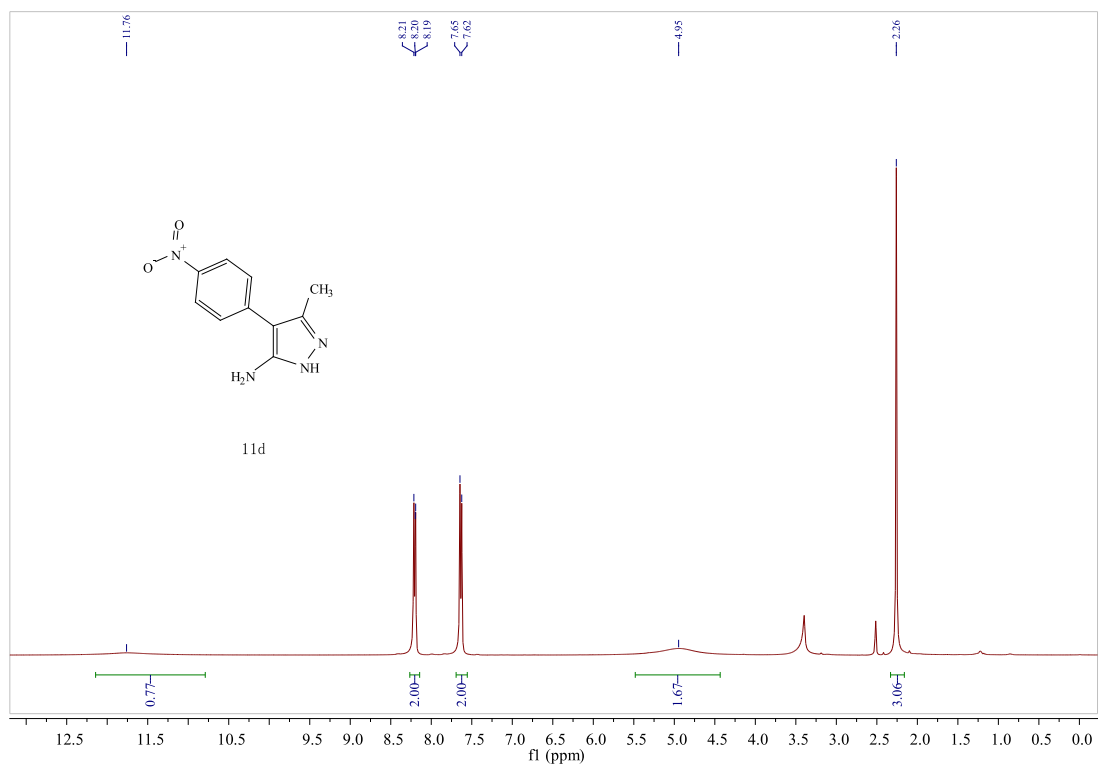

# $^1\text{H}$ NMR and $^{13}\text{C}$ NMR for 4a

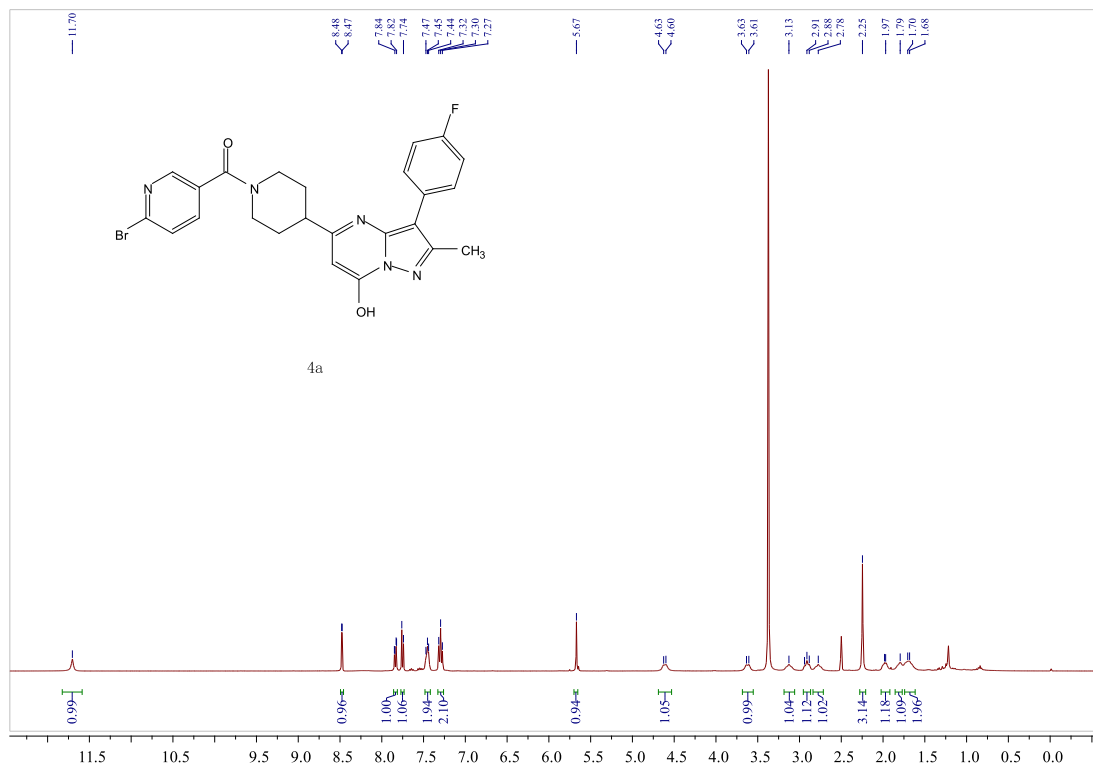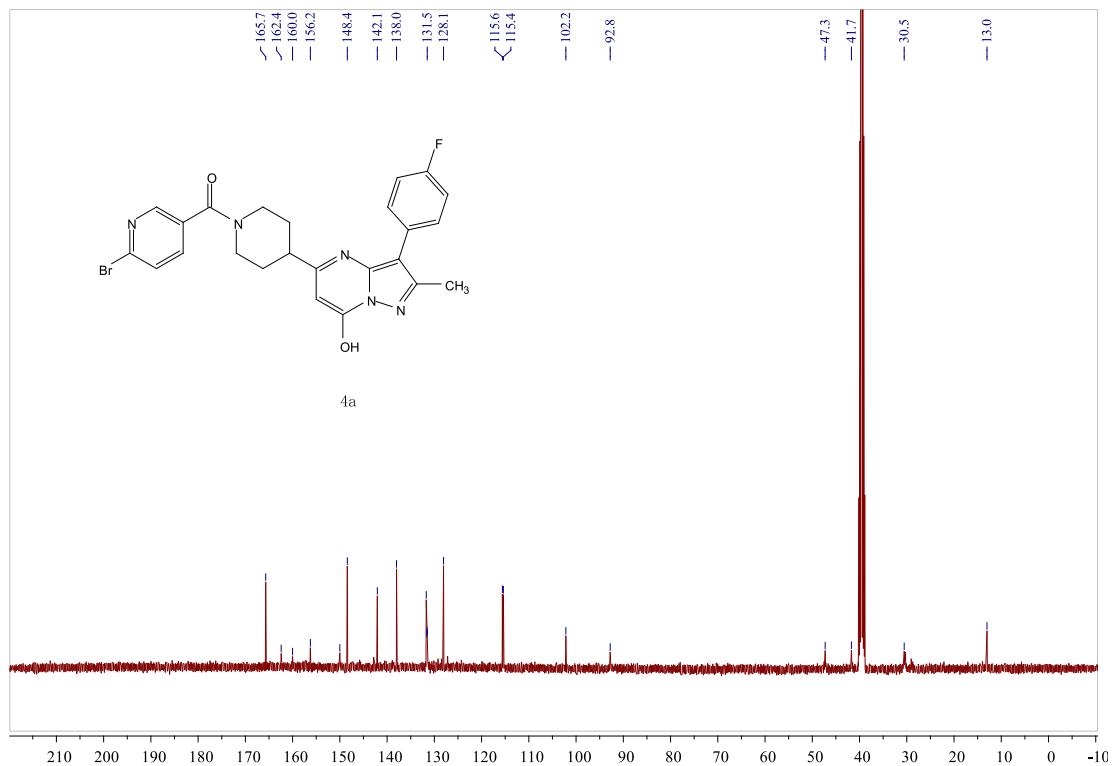

# $^1\text{H}$ NMR and $^{13}\text{C}$ NMR for 4b

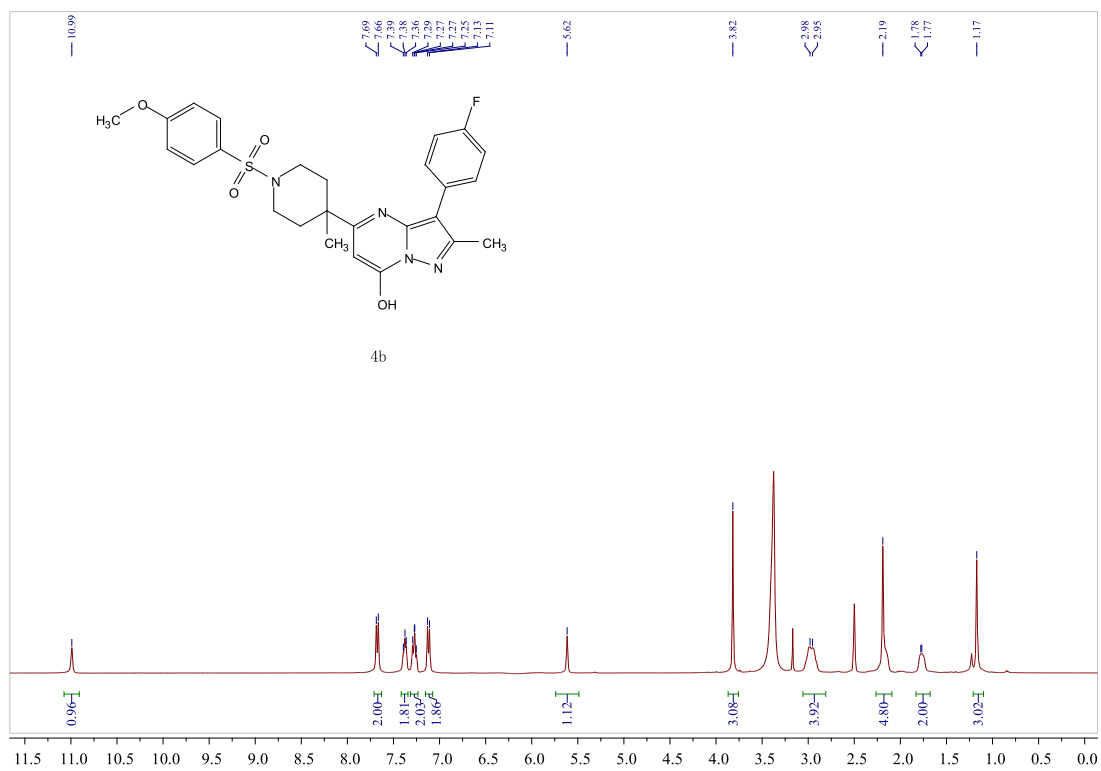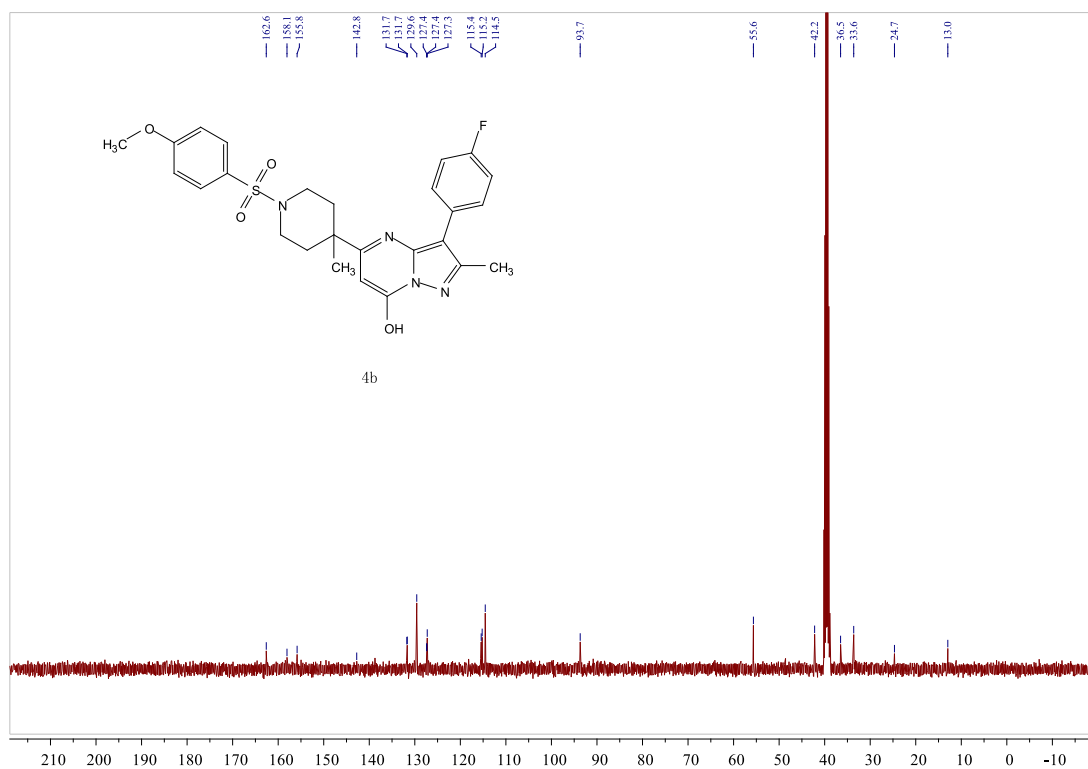

# $^1\text{H}$ NMR and $^{13}\text{C}$ NMR for 4c

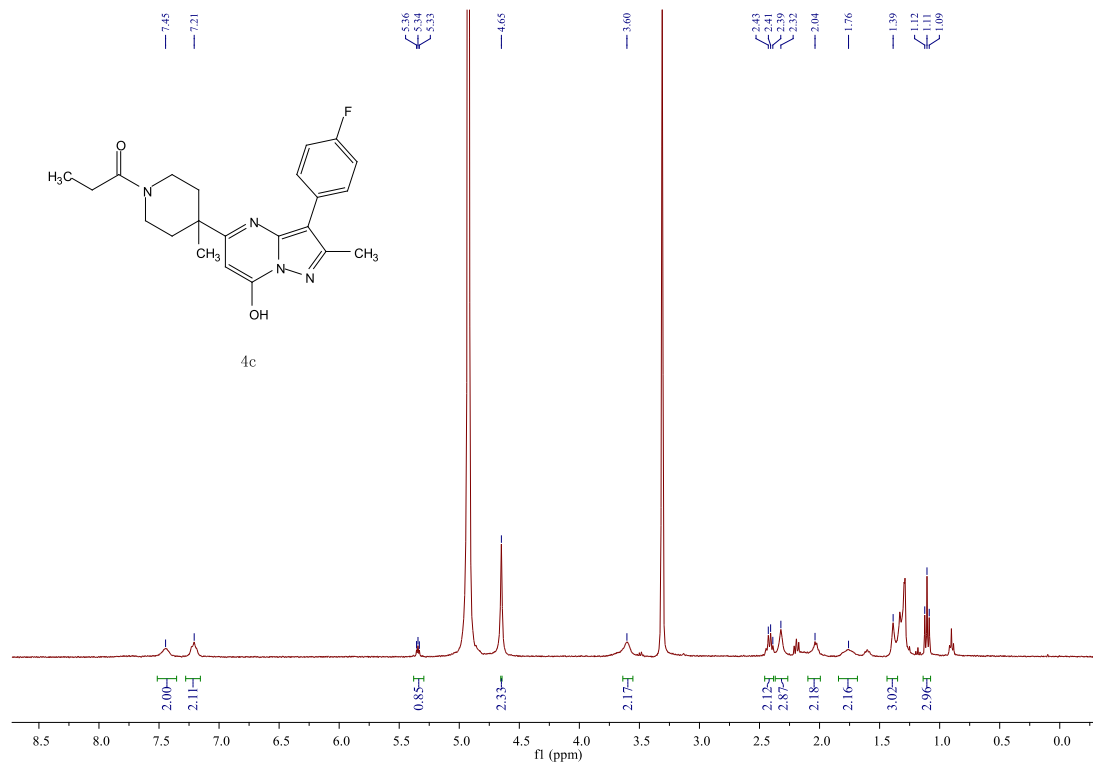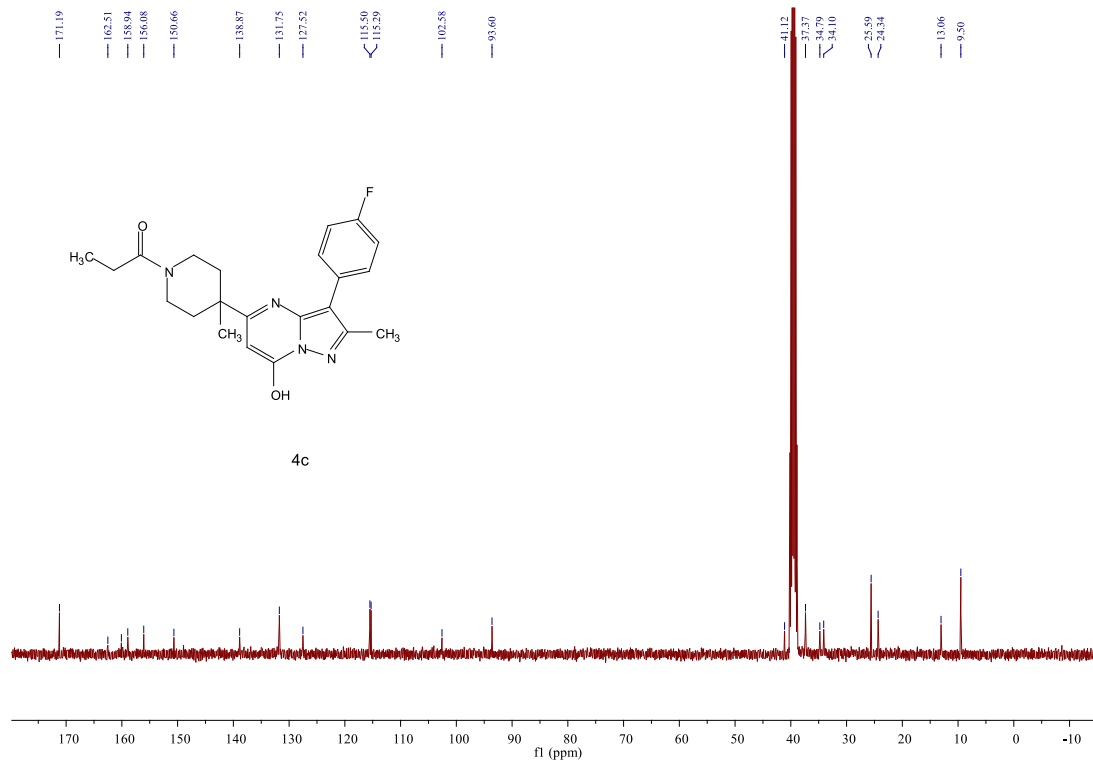

# <sup>1</sup>H NMR for 4d

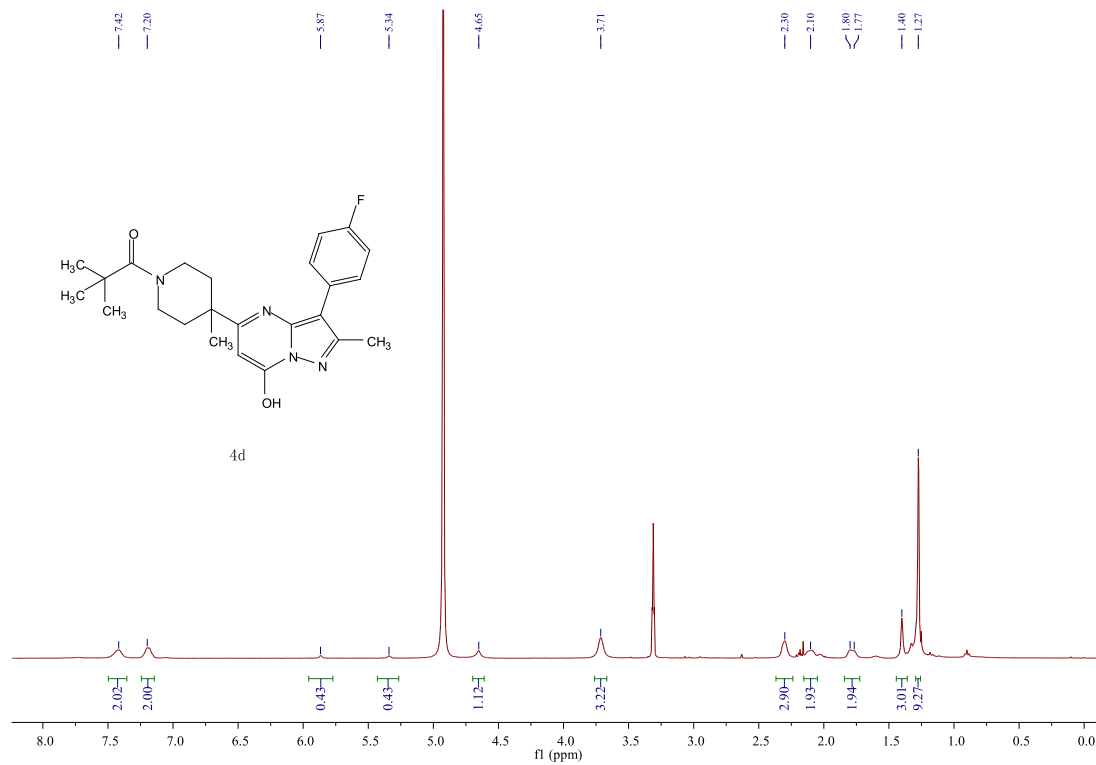

# $^1\text{H}$ NMR and $^{13}\text{C}$ NMR for 4e

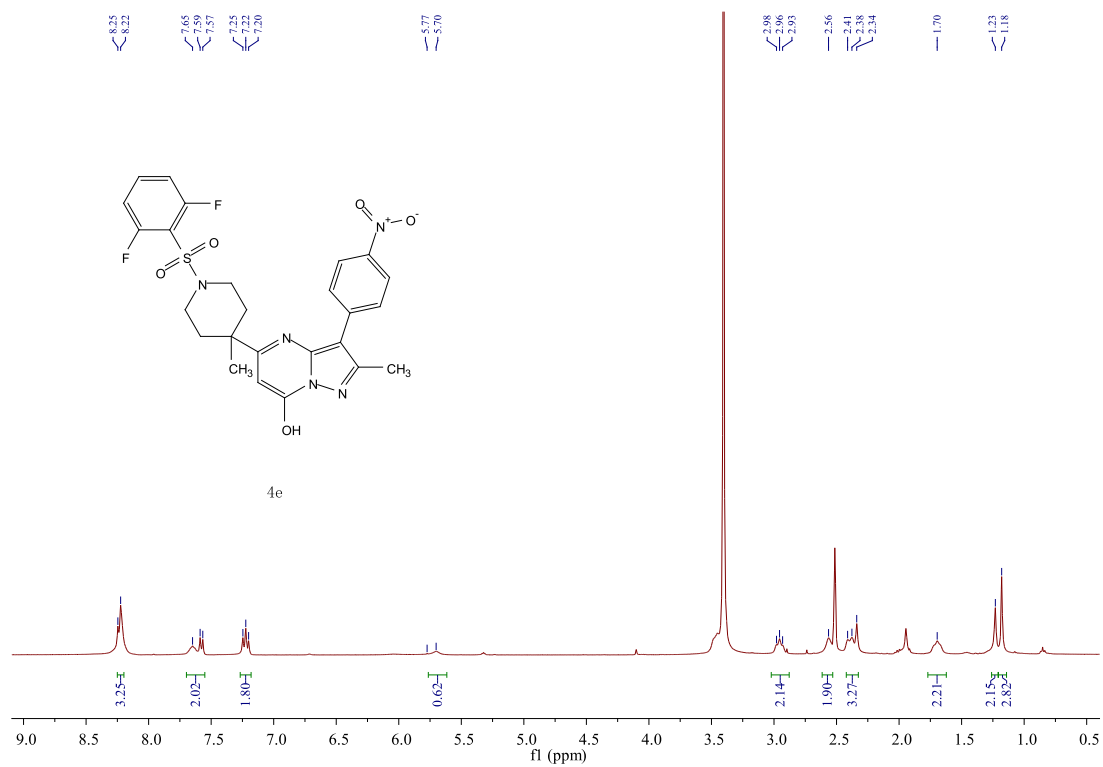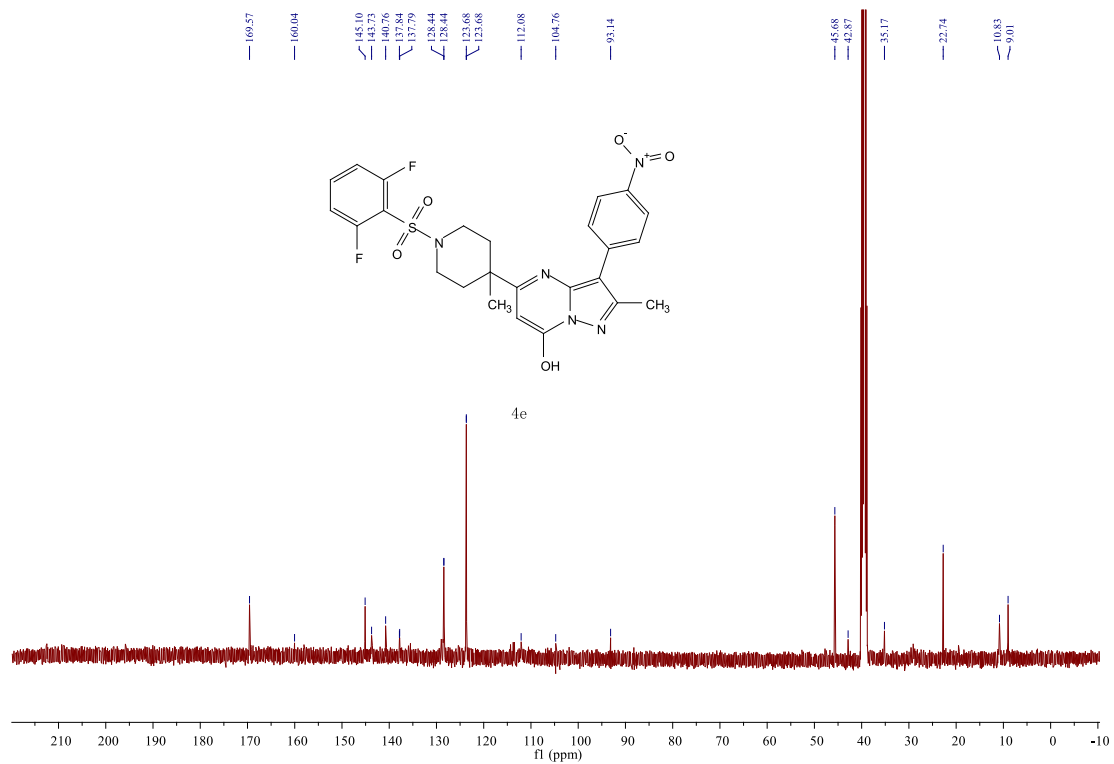

# <sup>1</sup>H NMR and <sup>13</sup>C NMR for 4f

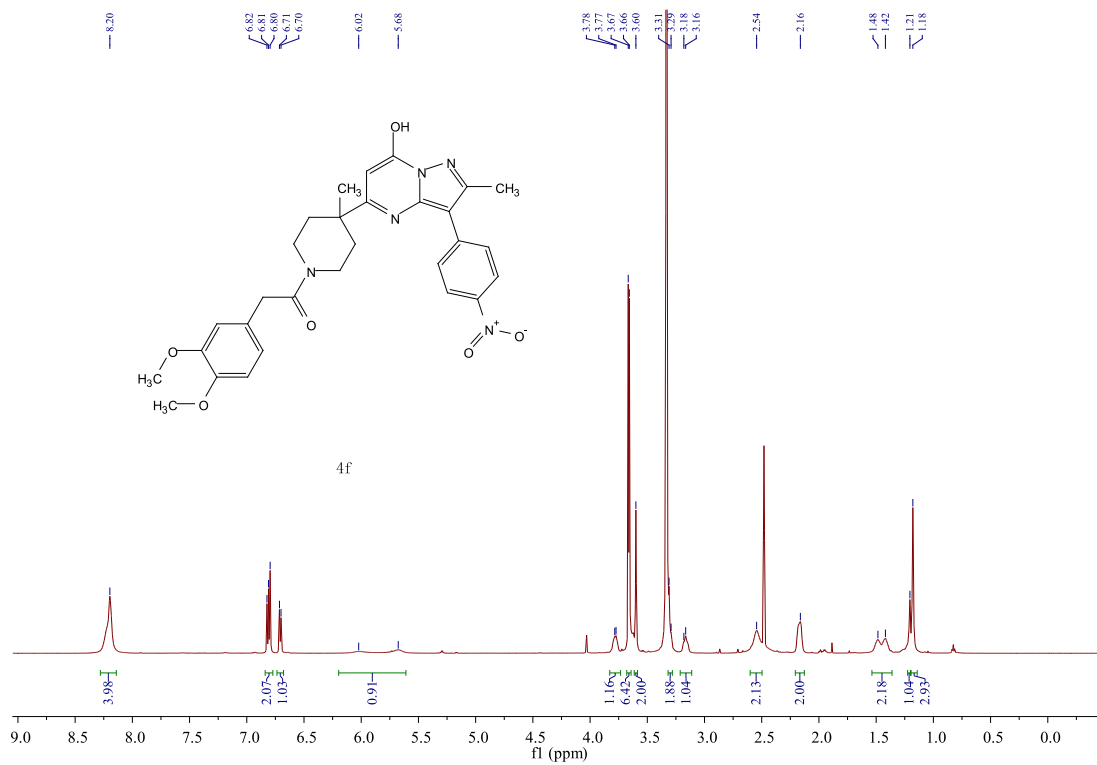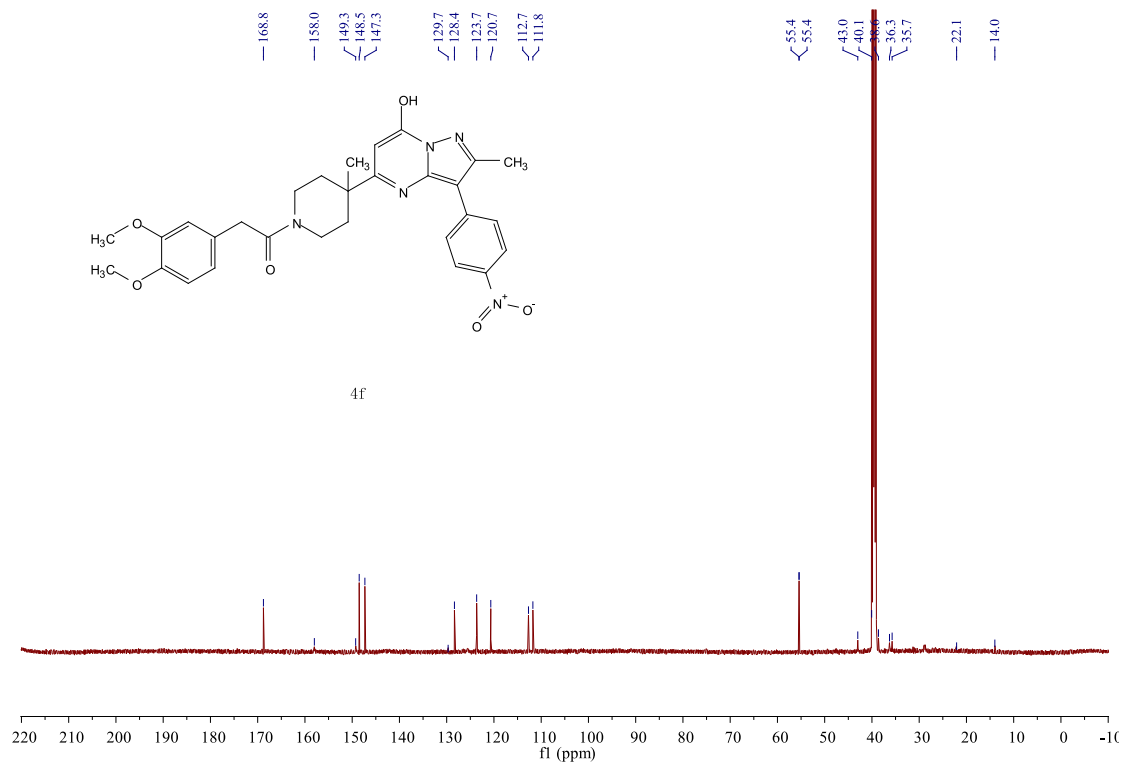

# <sup>1</sup>H NMR and <sup>13</sup>C NMR for 4g

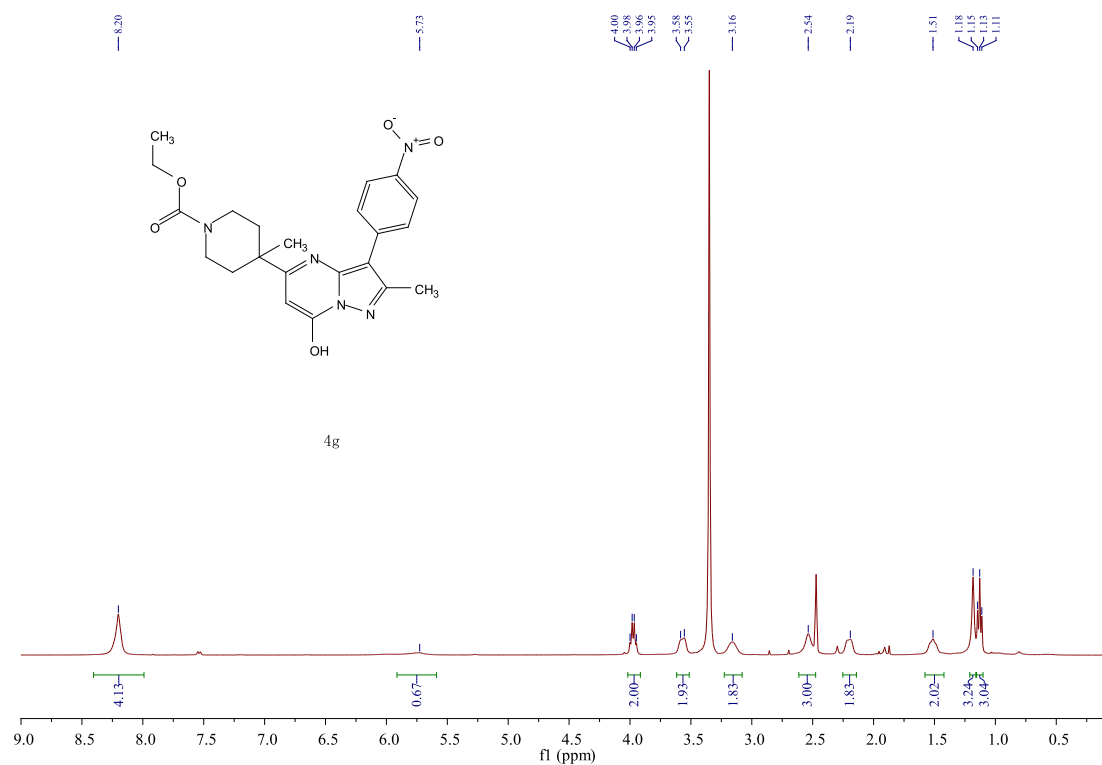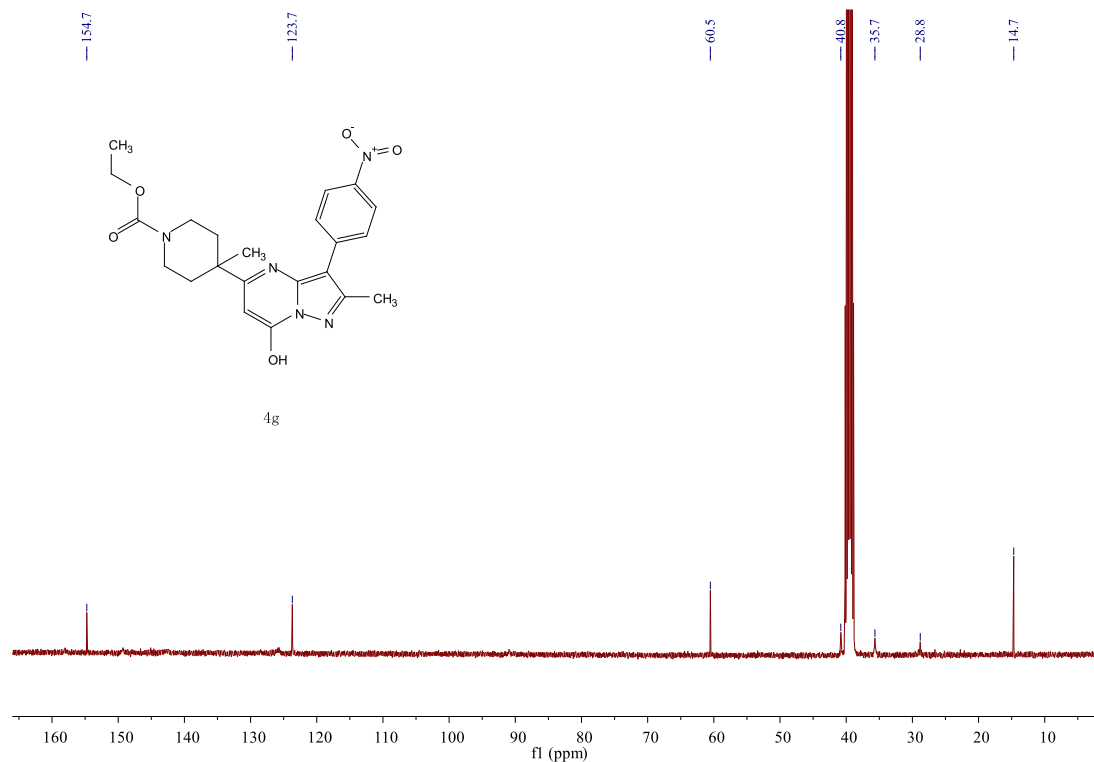



# $^1\text{H}$ NMR and $^{13}\text{C}$ NMR for 4h

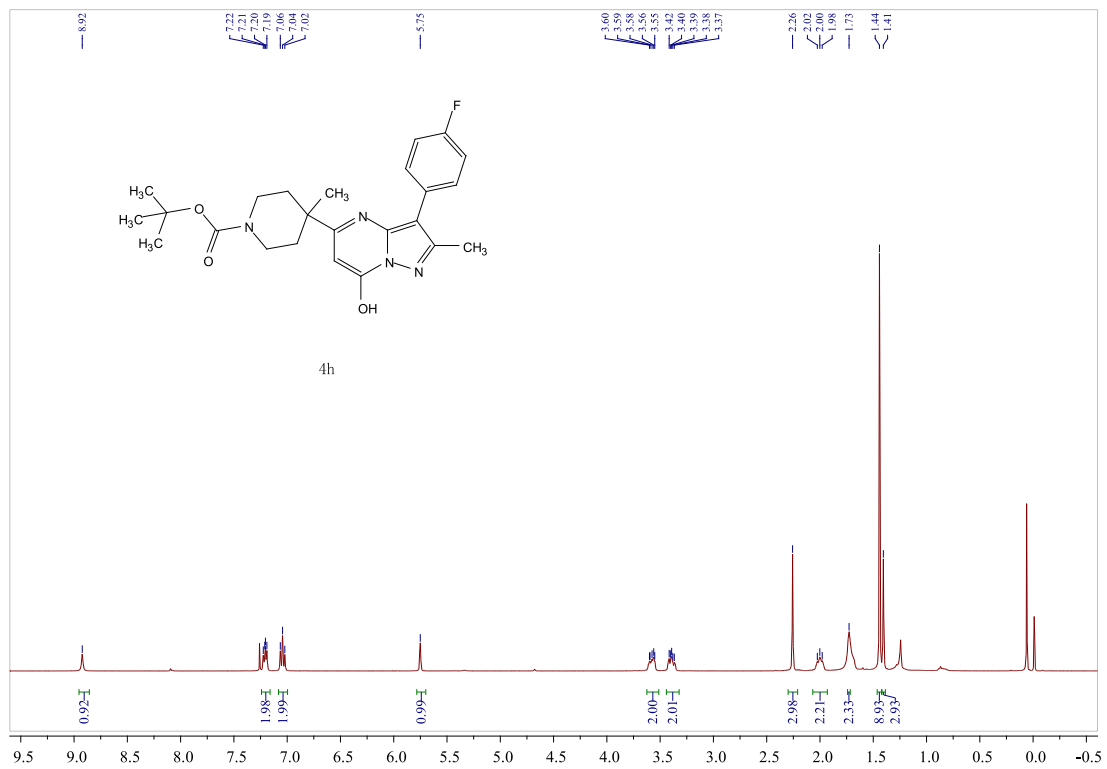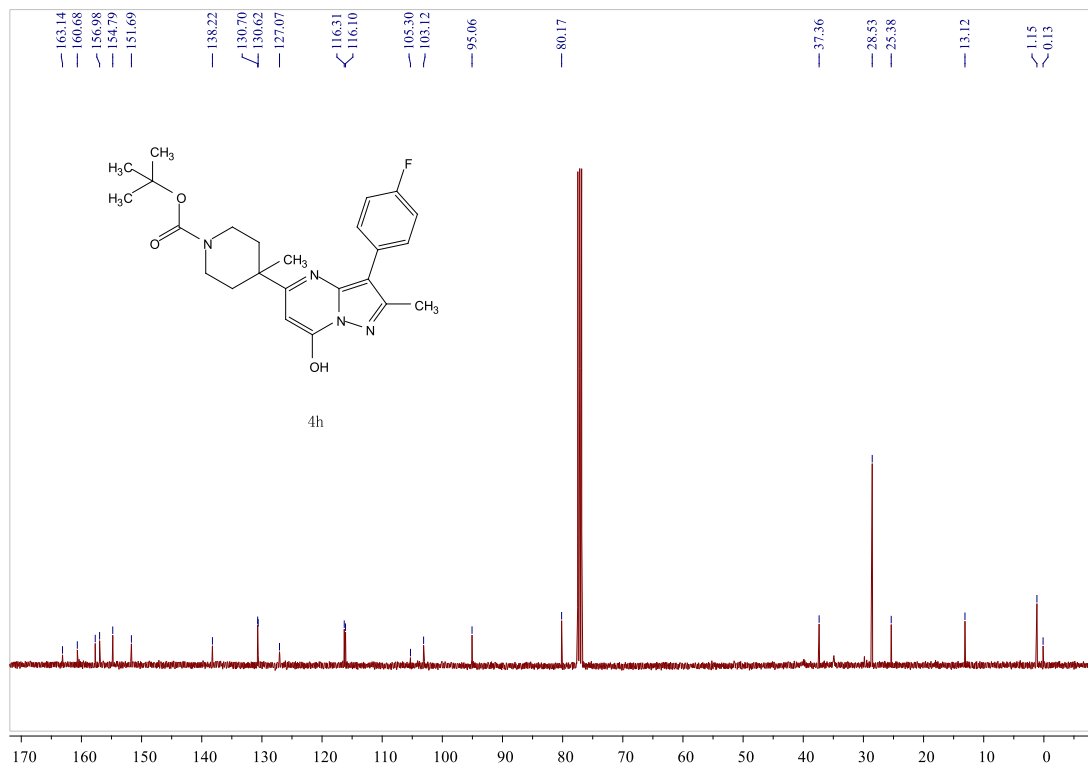

# <sup>1</sup>H NMR and <sup>13</sup>C NMR for 4i

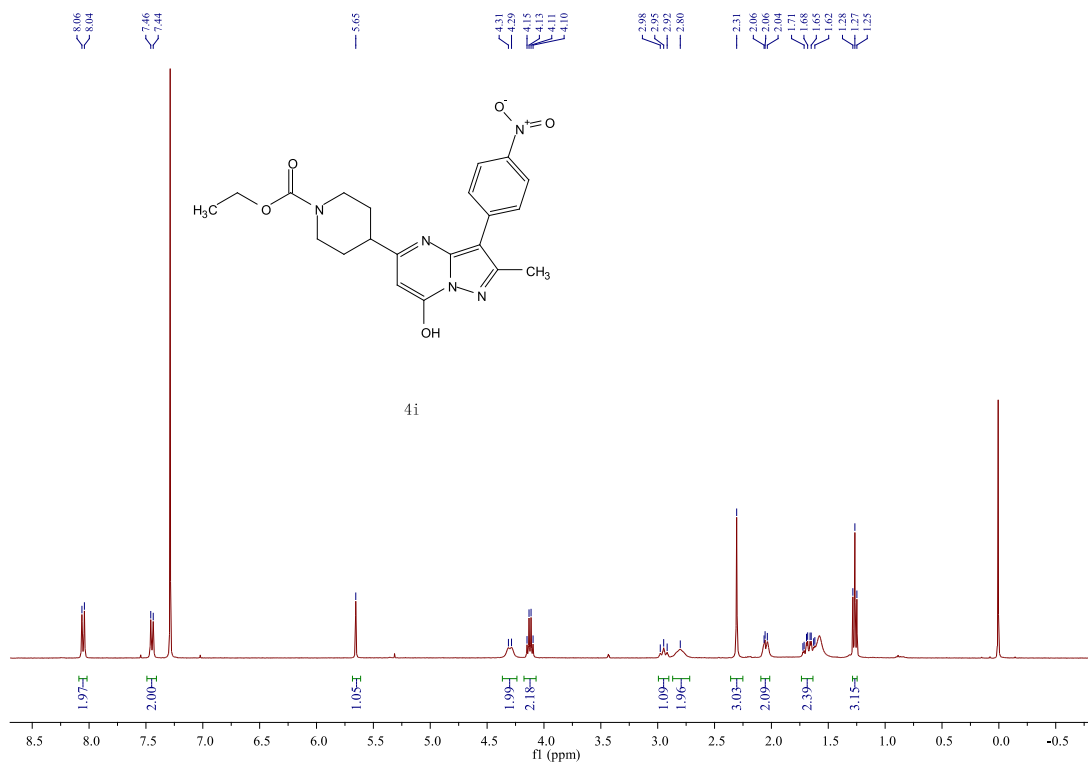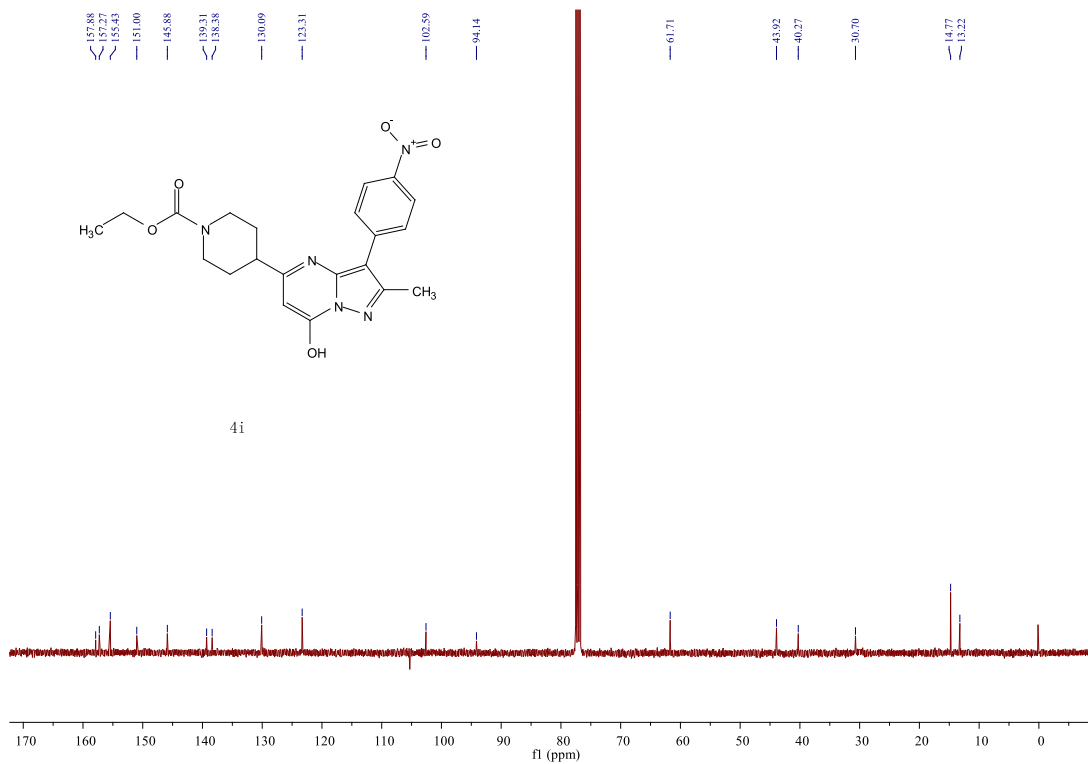

# <sup>1</sup>H NMR and <sup>13</sup>C NMR for 4j

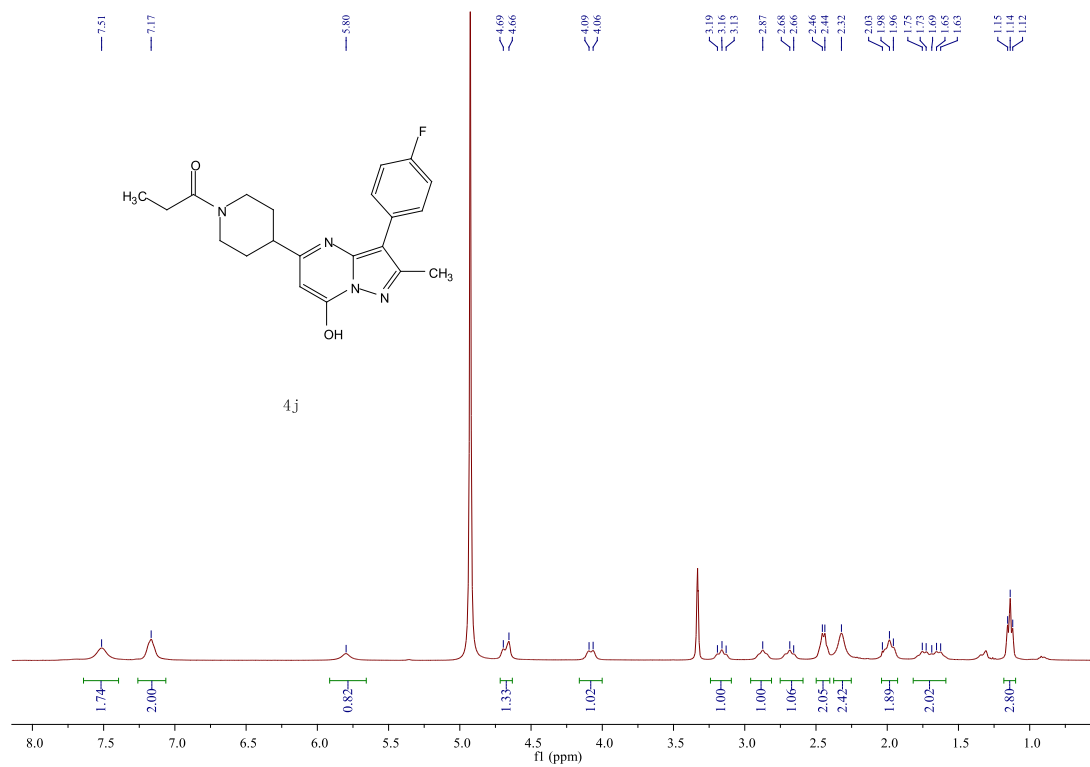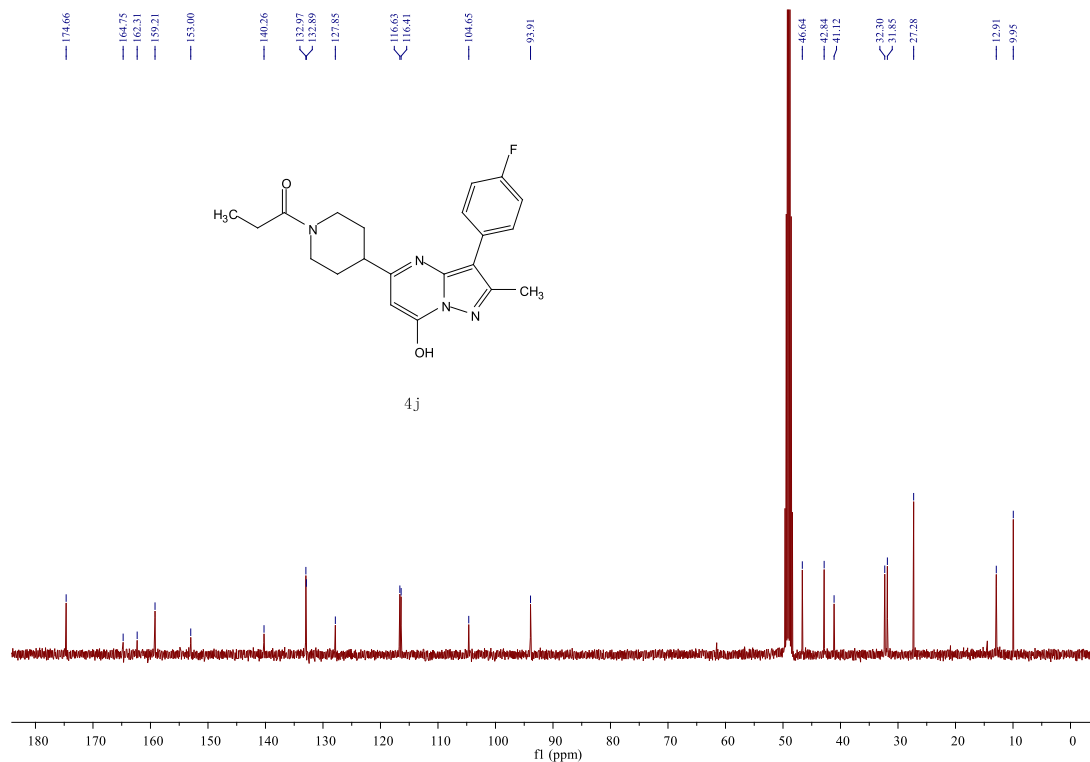

# $^1\text{H}$ NMR and $^{13}\text{C}$ NMR for 4k

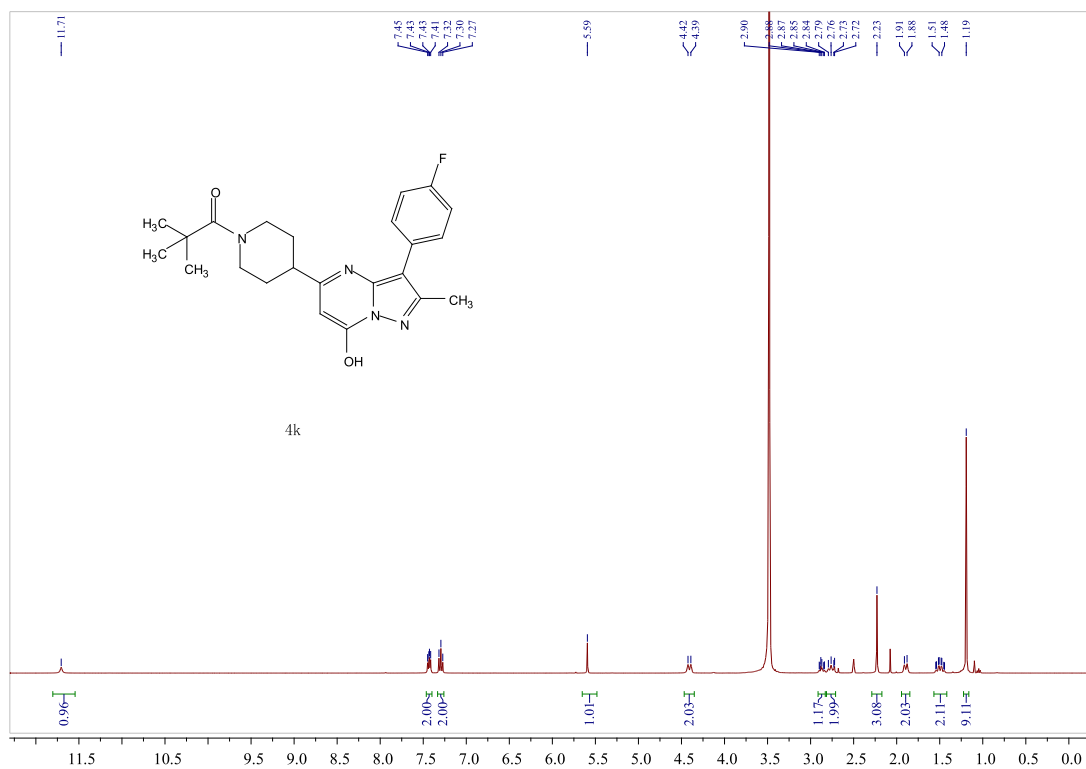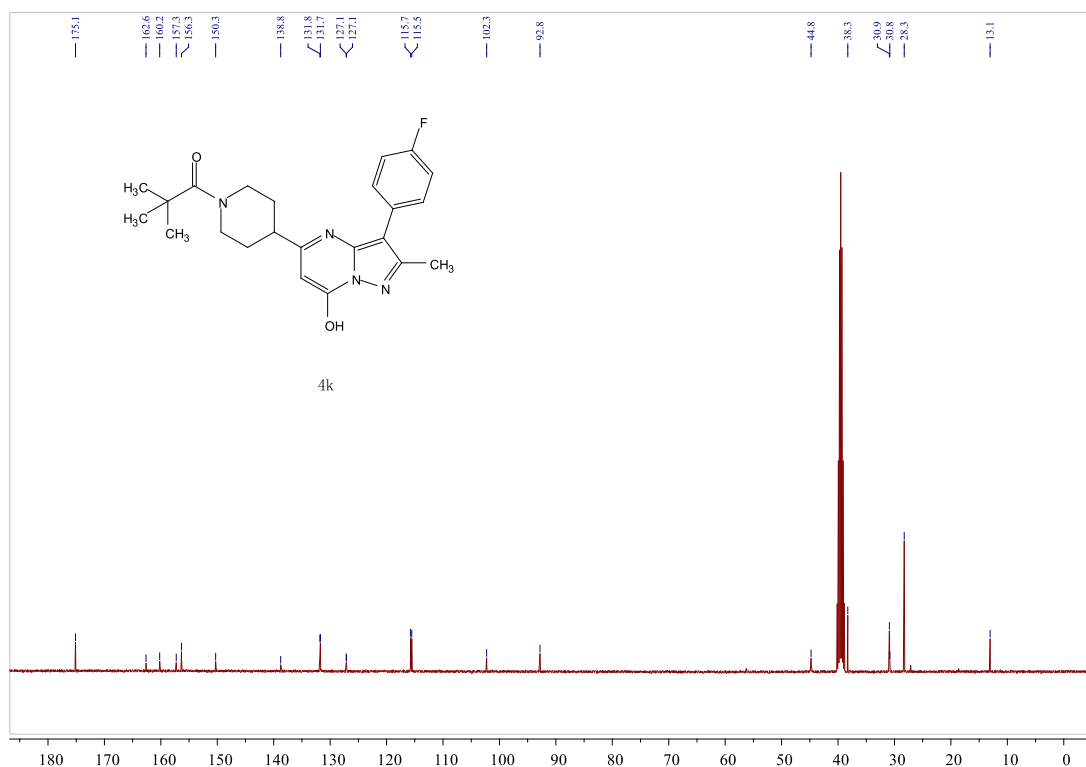

# $^1\text{H}$ NMR and $^{13}\text{C}$ NMR for 41

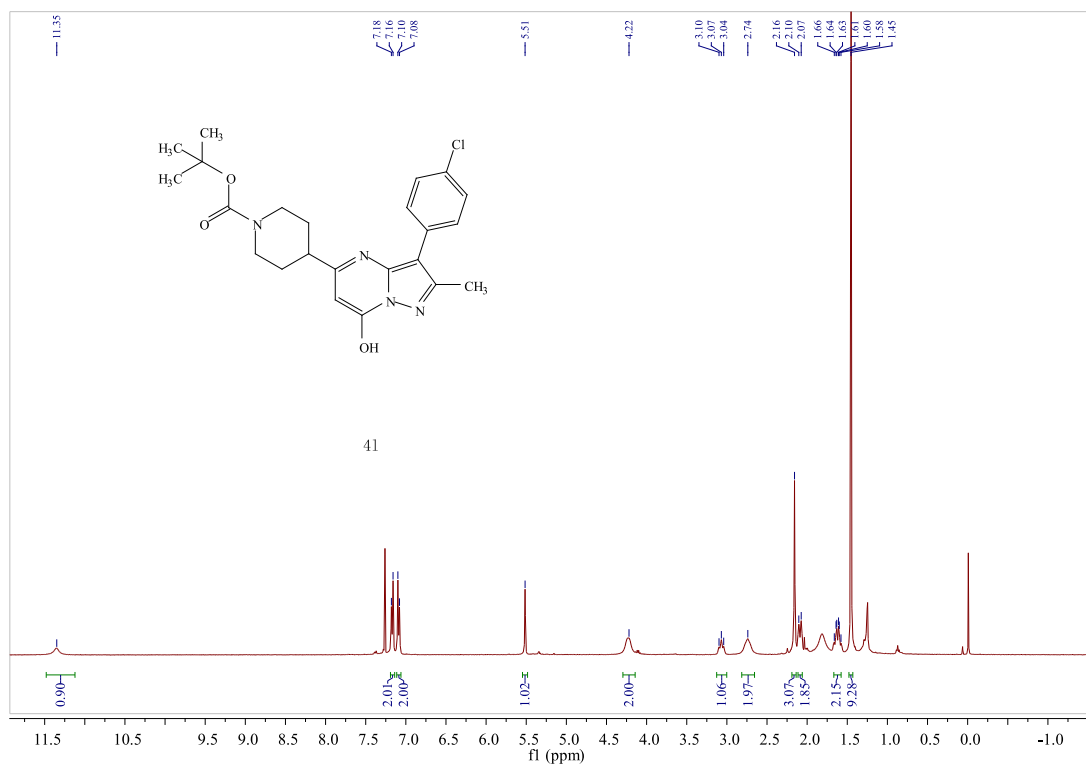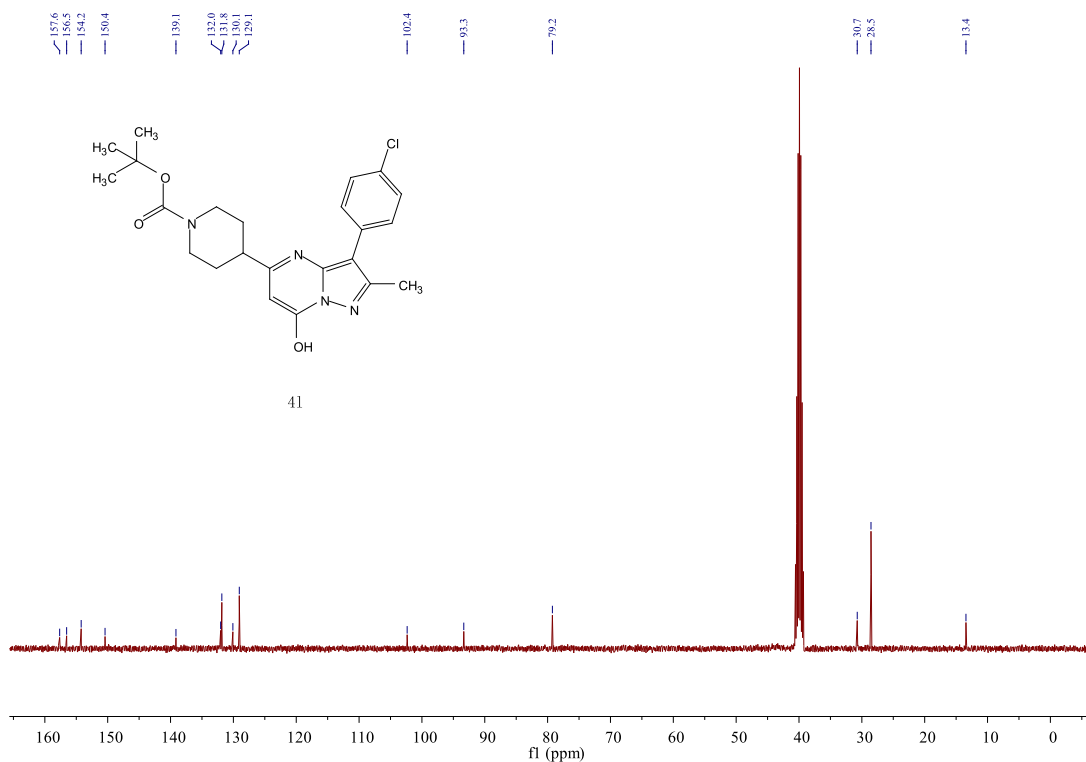

# <sup>1</sup>H NMR and <sup>13</sup>C NMR for 4m

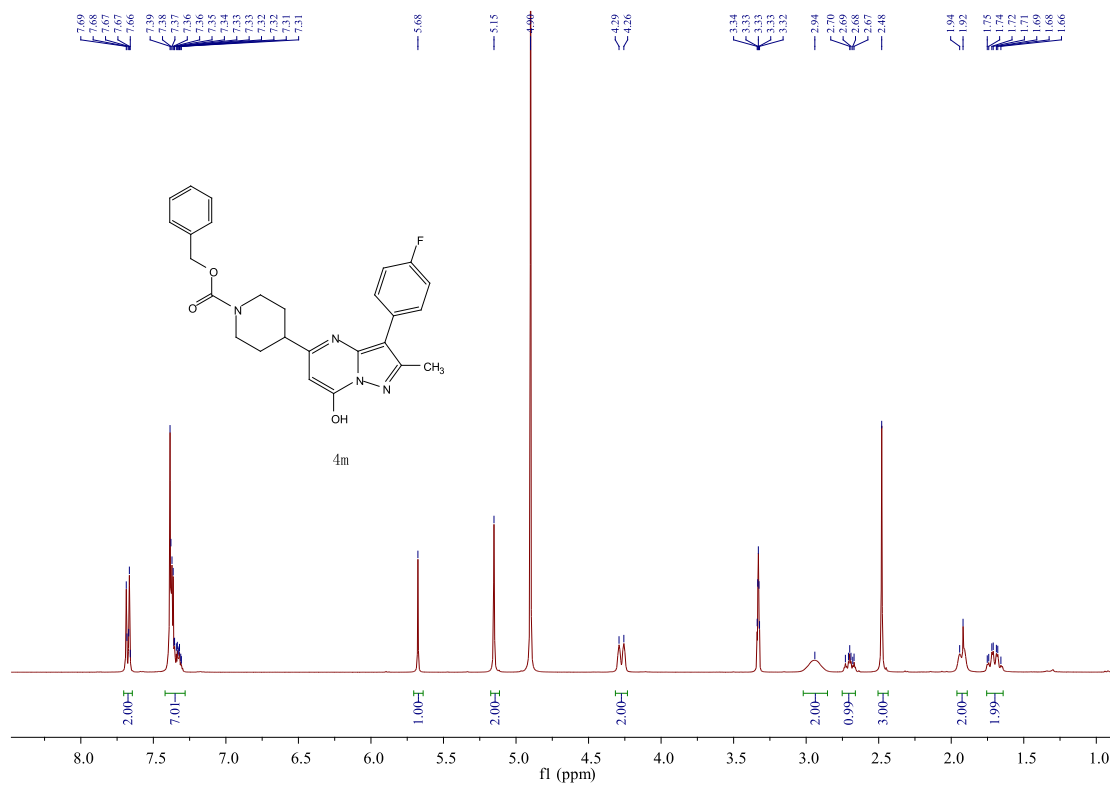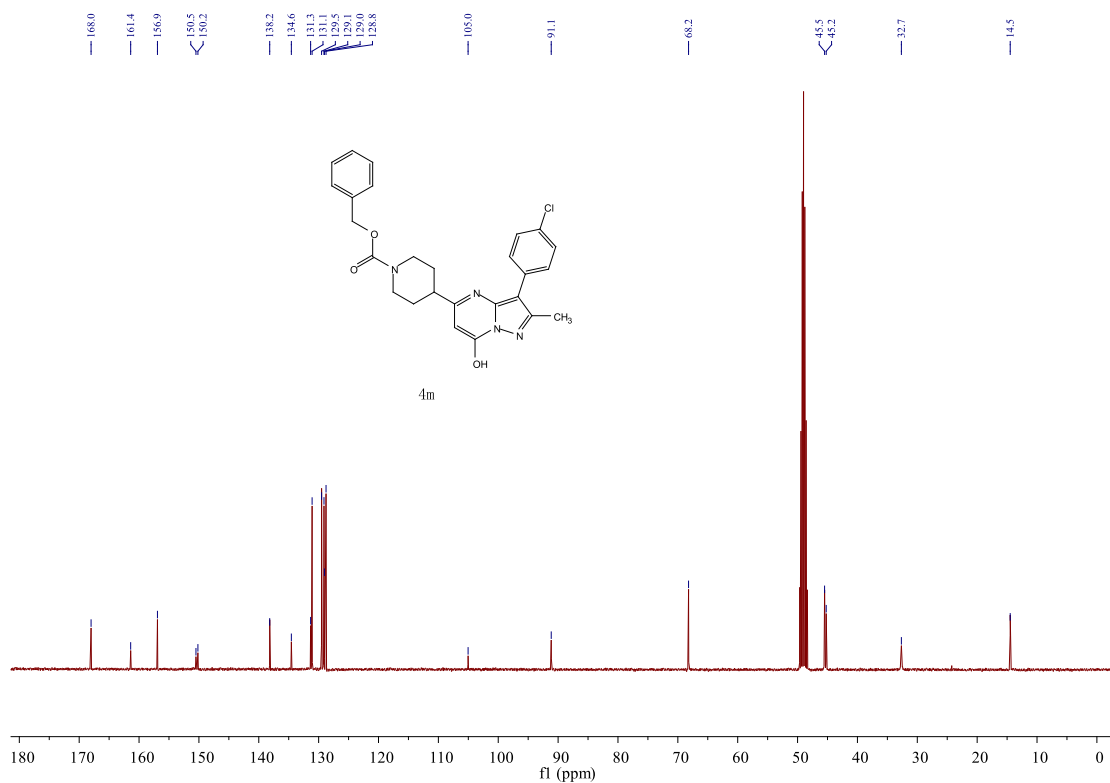

# <sup>1</sup>H NMR and <sup>13</sup>C NMR for 4n

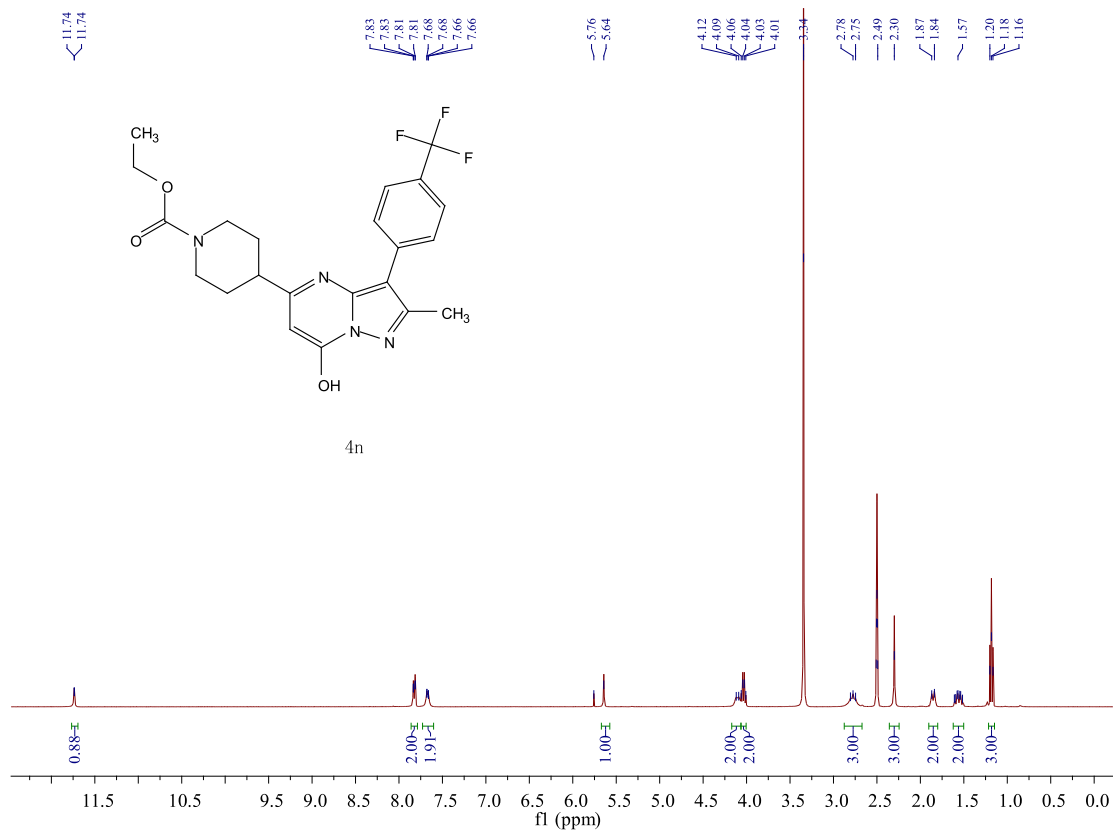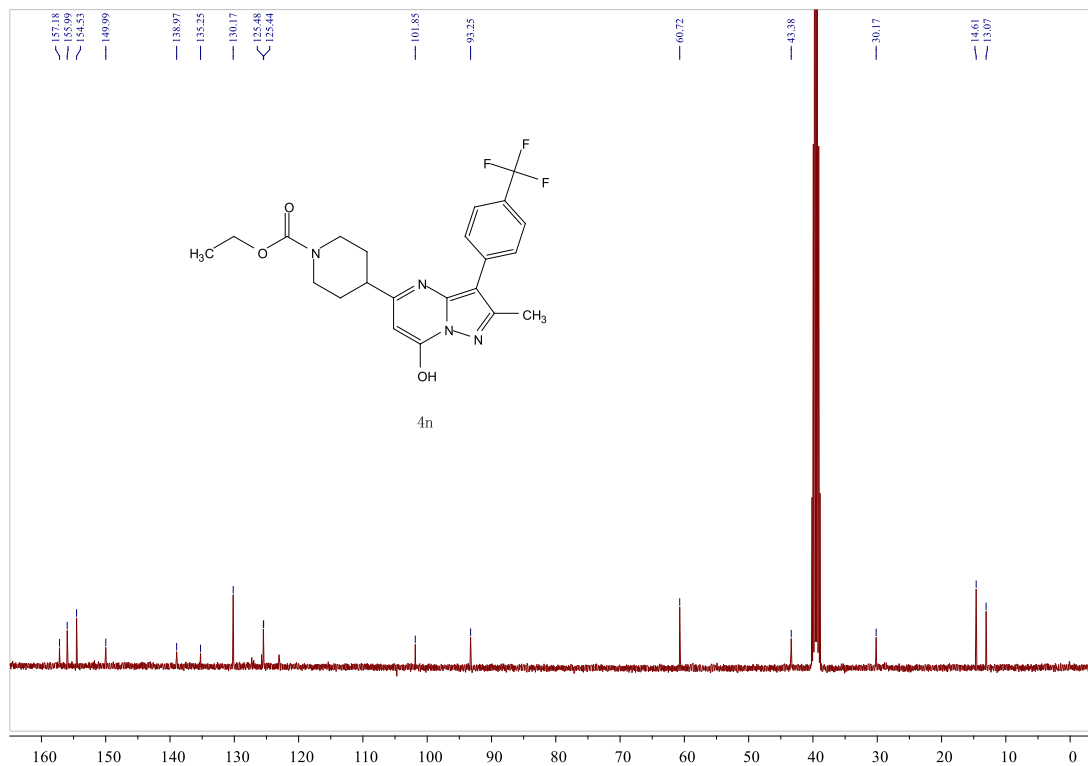

# <sup>1</sup>H NMR and <sup>13</sup>C NMR for 4o

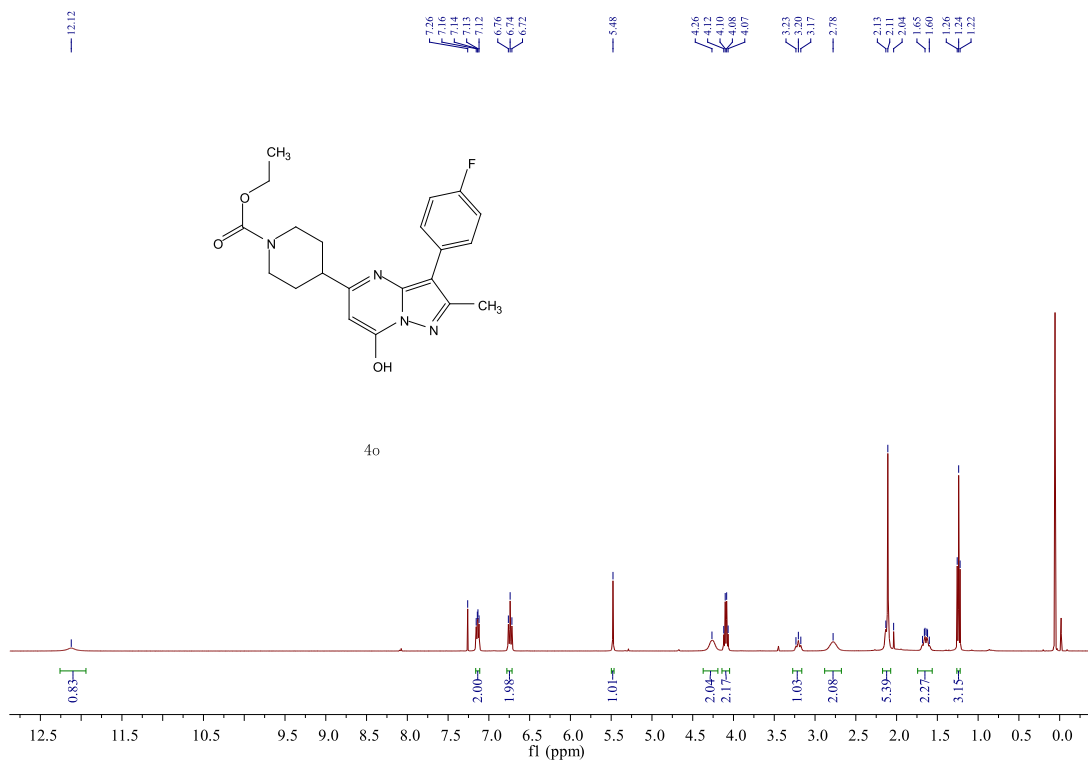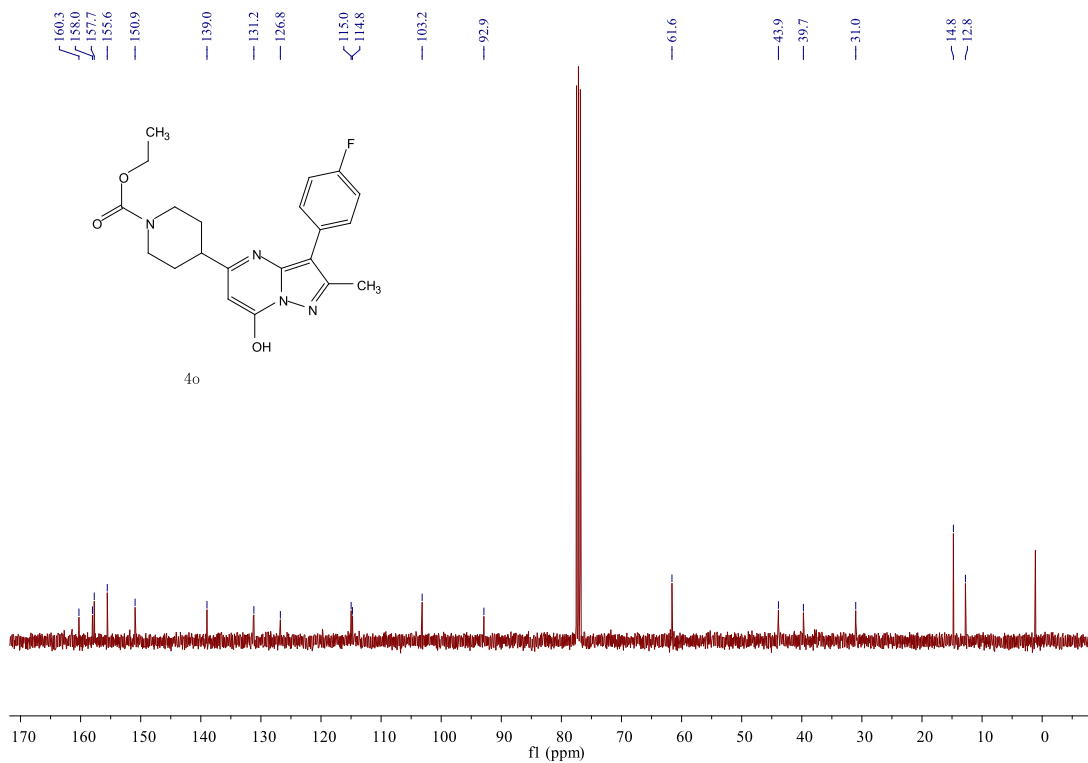



# <sup>1</sup>H NMR and <sup>13</sup>C NMR for 4p

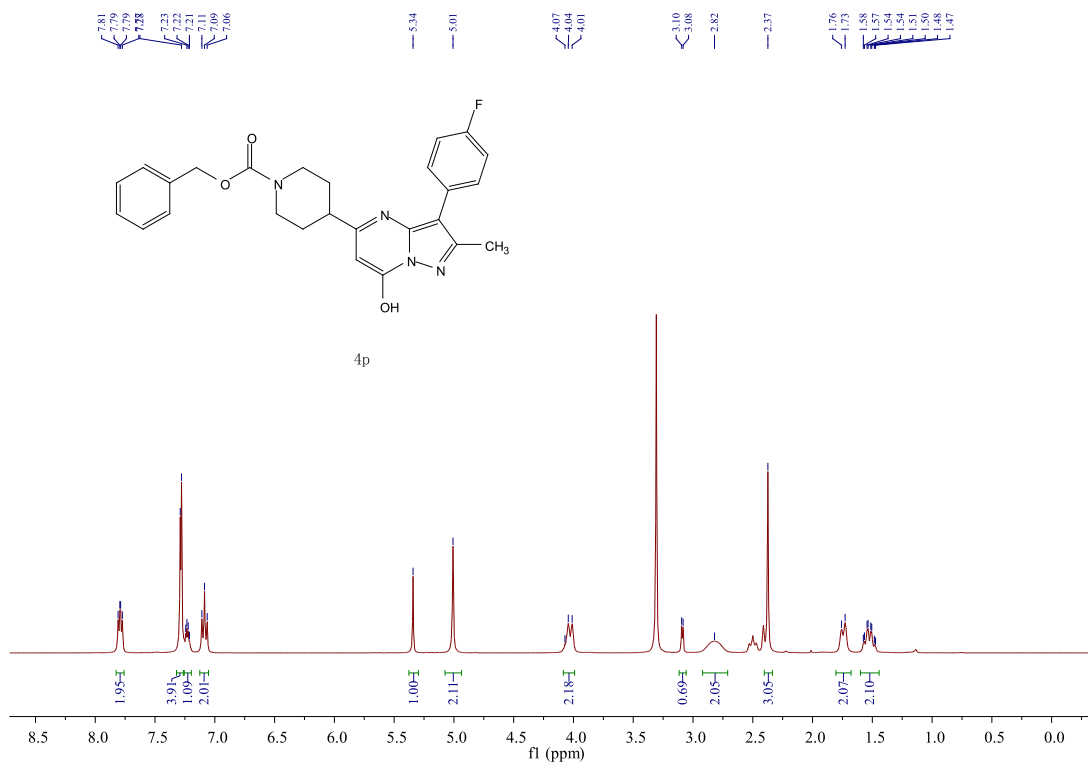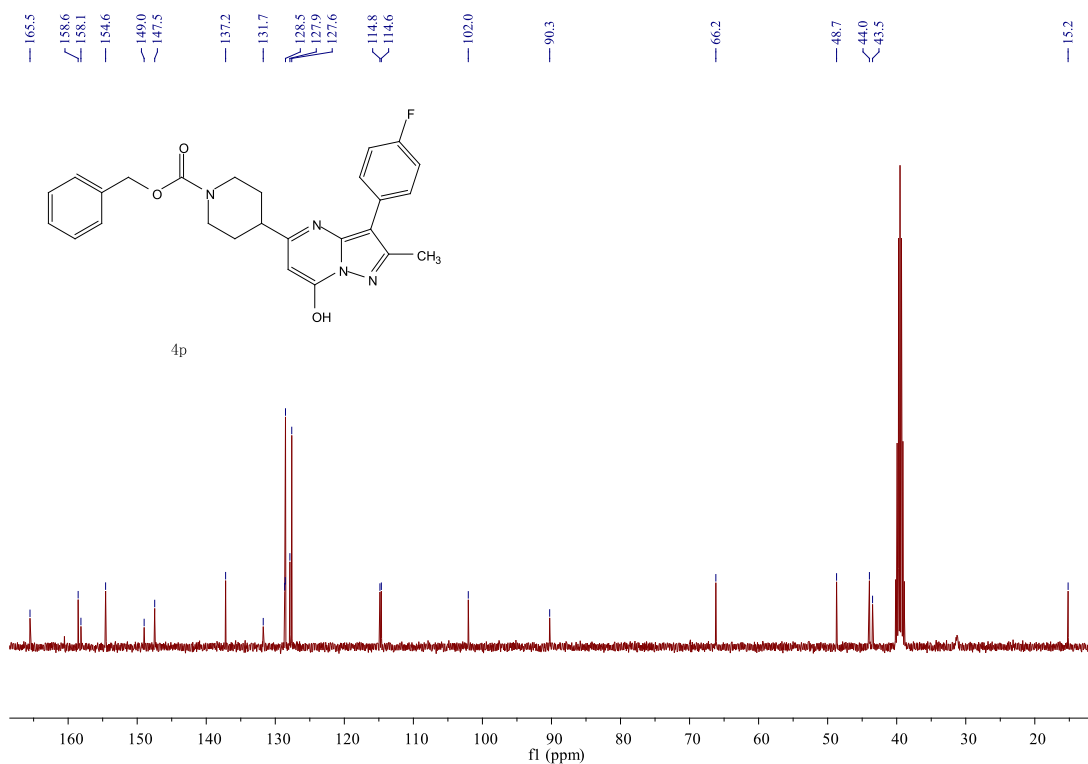

### PART 3. Reversed Phase HPLC results of 4a-4p

All the reversed phase HPLC were conducted on DIONEX Ultimate 3000 and all the results were obtained with the UV detection at 254 nm. Compounds **4d**, **4e**, **4m** were taken with Method A (Table 1) while the others were taken with Method B (Table 2). The results are listed in Table 3.

Table 1. Reversed Phase HPLC Method A

| Time(min) | (%)(H <sub>2</sub> O+0.1% Et <sub>3</sub> N) | (%)MeOH |
|-----------|----------------------------------------------|---------|
| 0         | 30                                           | 70      |
| 5         | 30                                           | 70      |
| 7         | 45                                           | 55      |
| 9         | 45                                           | 55      |
| 11        | 30                                           | 70      |
| 20        | 30                                           | 70      |

Table 2. Reversed Phase HPLC Method B

| Time(min) | (%)(H <sub>2</sub> O+0.1% Et <sub>3</sub> N) | (%)MeOH |
|-----------|----------------------------------------------|---------|
| 0         | 20                                           | 80      |
| 5         | 20                                           | 80      |
| 7         | 45                                           | 55      |
| 9         | 45                                           | 55      |
| 11        | 20                                           | 80      |
| 20        | 20                                           | 80      |

Reversed Phase for **4a** (Method A)

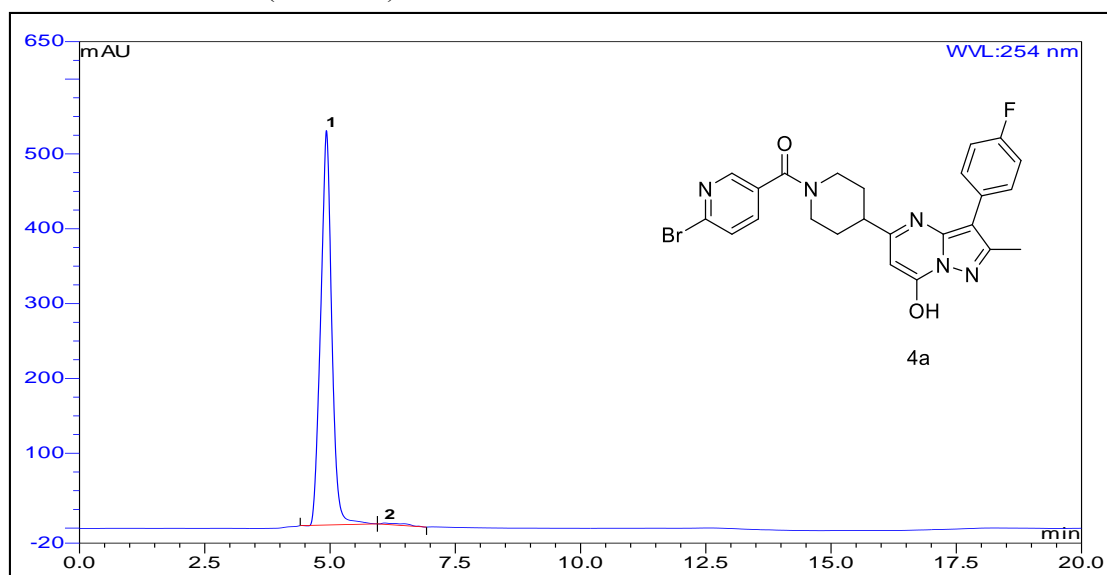

| No.   | Ret. Time min | Height mAU | Area mAU*min | Rel.Area % |
|-------|---------------|------------|--------------|------------|
| 1     | 4.93          | 526.95     | 134.64       | 99.08      |
| 2     | 6.09          | 1.76       | 1.26         | 0.92       |
| Total |               | 628.71     | 135.90       | 100.00     |

Reversed Phase for **4b** (Method A)

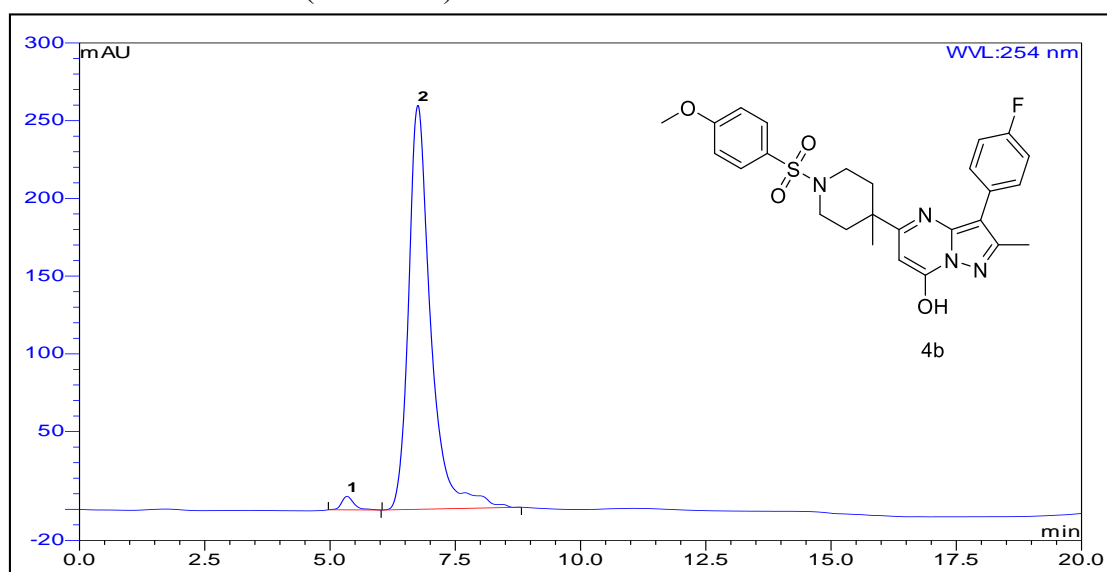

| No.   | Ret. Time min | Height mAU | Area mAU*min | Rel.Area % |
|-------|---------------|------------|--------------|------------|
| 1     | 5.34          | 8.69       | 2.51         | 1.85       |
| 2     | 6.75          | 259.86     | 133.30       | 98.51      |
| Total |               | 268.54     | 135.81       | 100.00     |

### Reversed Phase for 4c (Method A)

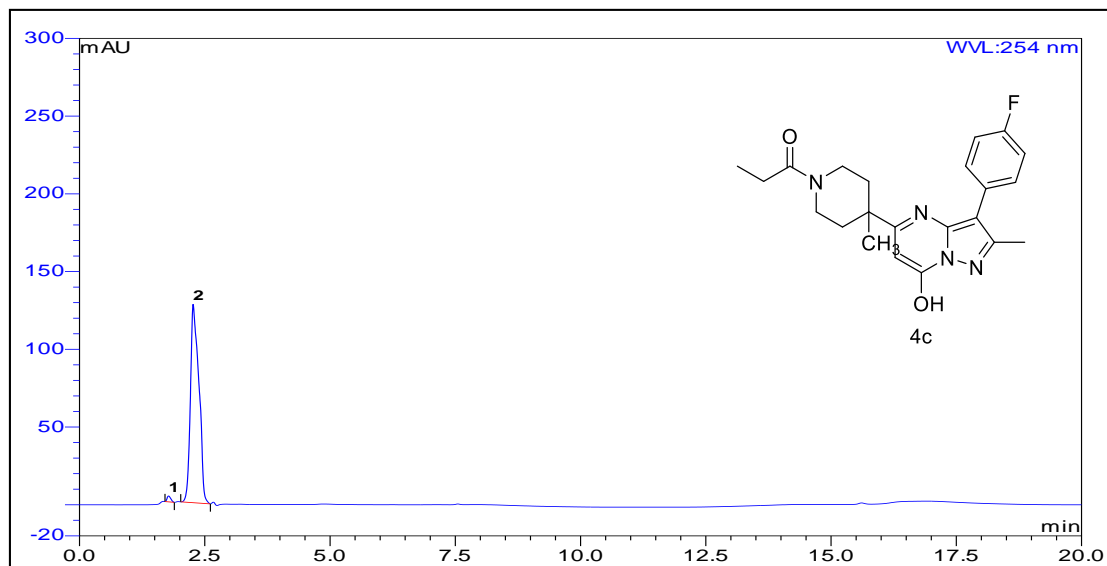

| No.   | Ret. Time min | Height mAU | Area mAU*min | Rel.Area % |
|-------|---------------|------------|--------------|------------|
| 1     | 1.78          | 3.81       | 0.33         | 1.29       |
| 2     | 2.27          | 127.56     | 25.10        | 98.71      |
| Total |               | 131.37     | 25.43        | 100.00     |

### Reversed Phase for 4d (Method B)

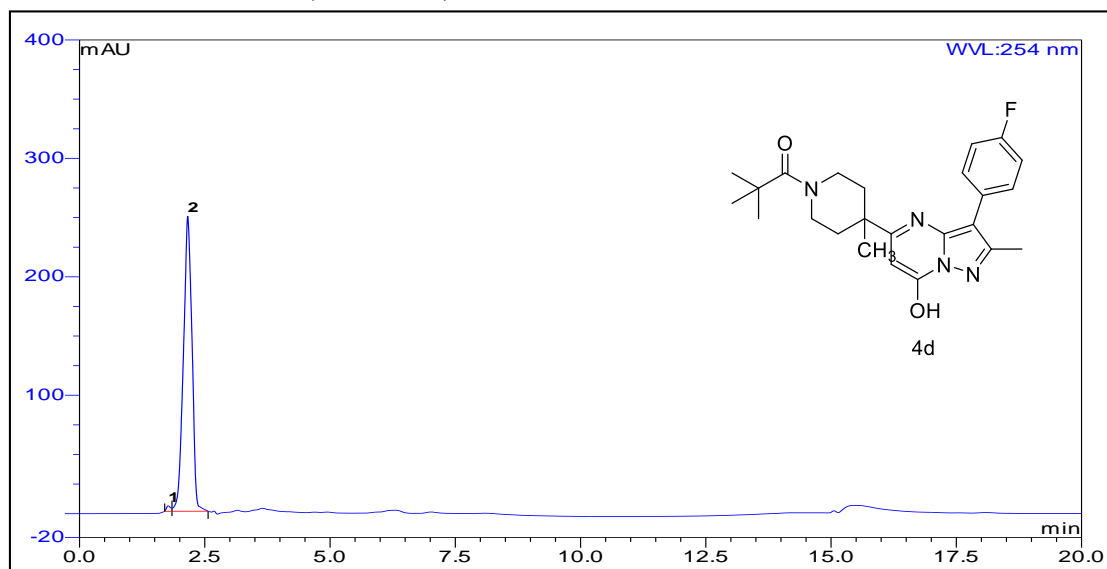

| No.   | Ret. Time min | Height mAU | Area mAU*min | Rel.Area % |
|-------|---------------|------------|--------------|------------|
| 1     | 1.77          | 4.54       | 0.44         | 0.89       |
| 2     | 2.16          | 249.09     | 49.37        | 99.11      |
| Total |               | 253.63     | 49.81        | 100.00     |

### Reversed Phase for 4e(Method B)

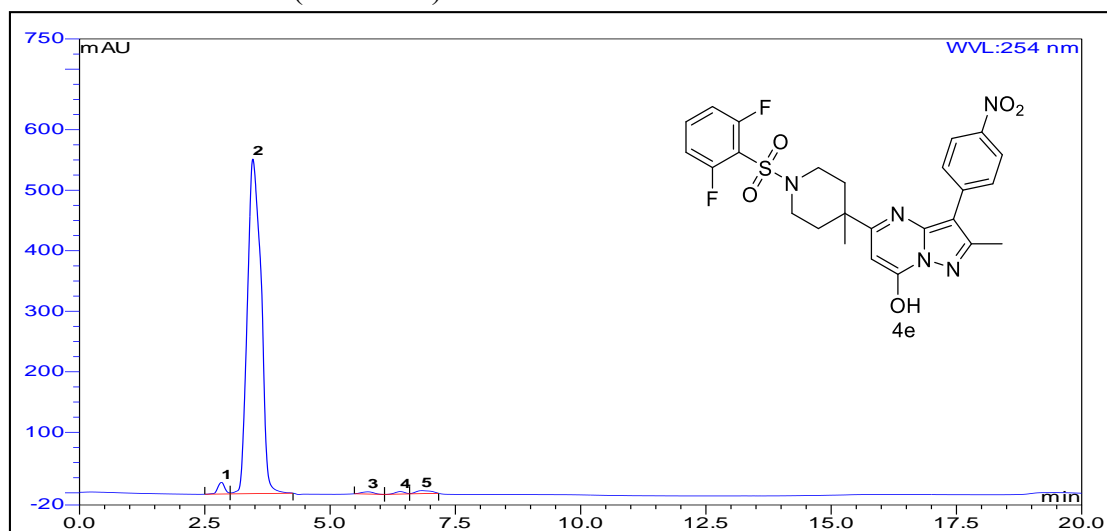

| No.   | Ret. Time<br>min | Height<br>mAU | Area<br>mAU*min | Rel.Area<br>% |
|-------|------------------|---------------|-----------------|---------------|
| 1     | 2.83             | 19.23         | 3.13            | 1.73          |
| 2     | 3.46             | 552.86        | 174.37          | 96.21         |
| 3     | 5.75             | 3.63          | 1.01            | 0.56          |
| 4     | 6.40             | 4.13          | 0.92            | 0.51          |
| 5     | 6.83             | 4.98          | 1.81            | 1.00          |
| Total |                  | 584.84        | 181.25          | 100.00        |

### Reversed Phase for 4f (Method A)

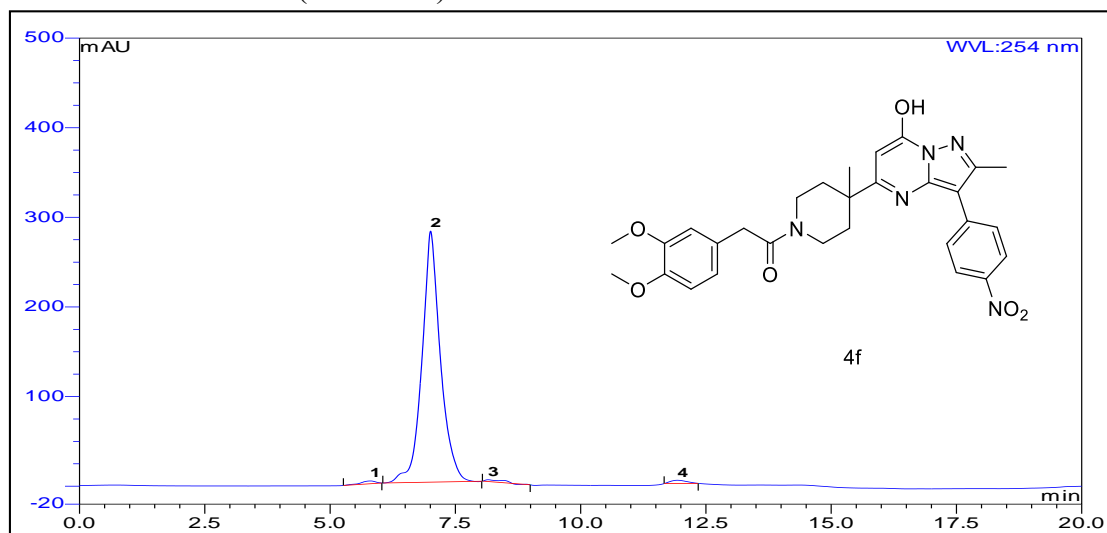

| No.   | Ret. Time<br>min | Height<br>mAU | Area<br>mAU*min | Rel.Area<br>% |
|-------|------------------|---------------|-----------------|---------------|
| 1     | 5.80             | 3.11          | 1.08            | 0.88          |
| 2     | 7.01             | 280.16        | 119.40          | 97.24         |
| 3     | 8.15             | 1.99          | 0.94            | 0.76          |
| 4     | 11.93            | 3.62          | 1.37            | 1.11          |
| Total |                  | 288.88        | 122.79          | 100.00        |

### Reversed Phase for 4g (Method A)

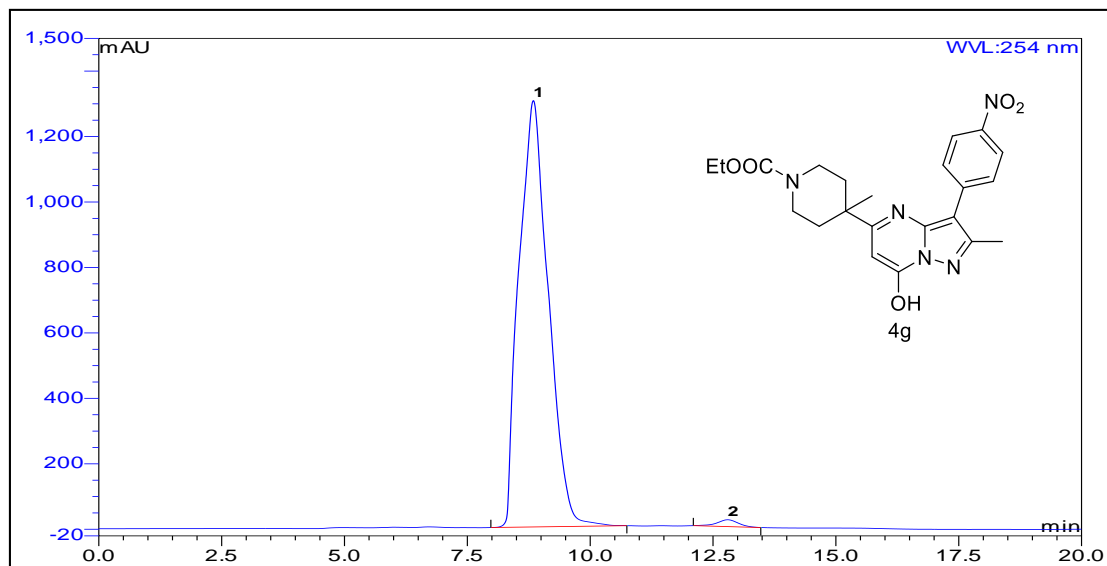

| No.   | Ret. Time<br>min | Height<br>mAU | Area<br>mAU*min | Rel.Area<br>% |
|-------|------------------|---------------|-----------------|---------------|
| 1     | 8.85             | 1302.57       | 901.50          | 98.85         |
| 2     | 12.80            | 20.78         | 10.48           | 1.15          |
| Total |                  | 1323.35       | 911.98          | 100.00        |

### Reversed Phase for 4h (Method A)

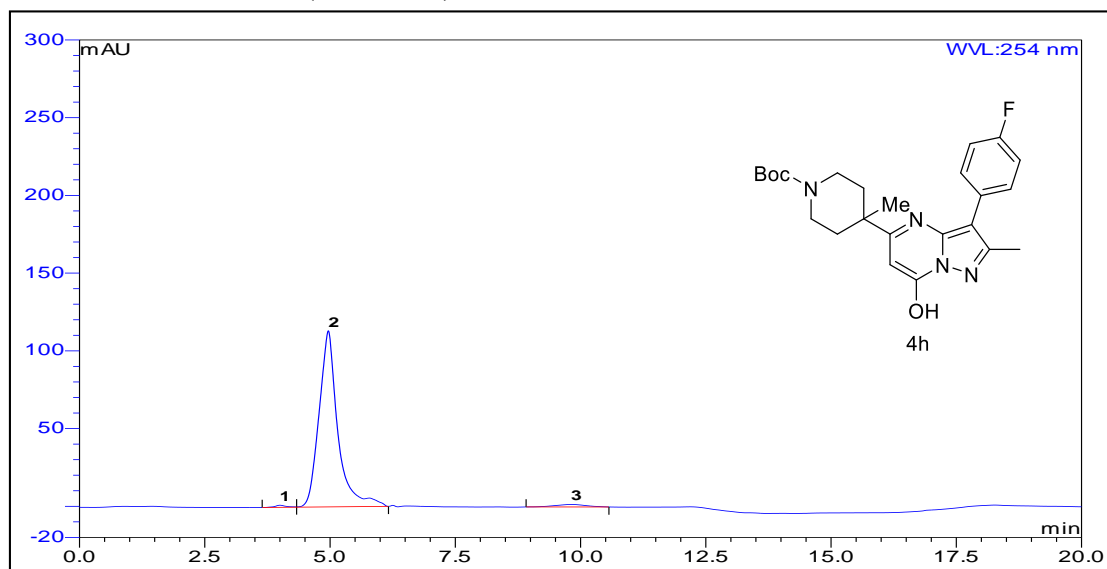

| No.   | Ret. Time<br>min | Height<br>mAU | Area<br>mAU*min | Rel.Area<br>% |
|-------|------------------|---------------|-----------------|---------------|
| 1     | 4.00             | 1.38          | 0.36            | 0.71          |
| 2     | 4.97             | 113.30        | 49.06           | 97.02         |
| 3     | 9.81             | 1.62          | 1.15            | 2.27          |
| Total |                  | 116.30        | 50.57           | 100.00        |

### Reversed Phase for 4i (Method A)

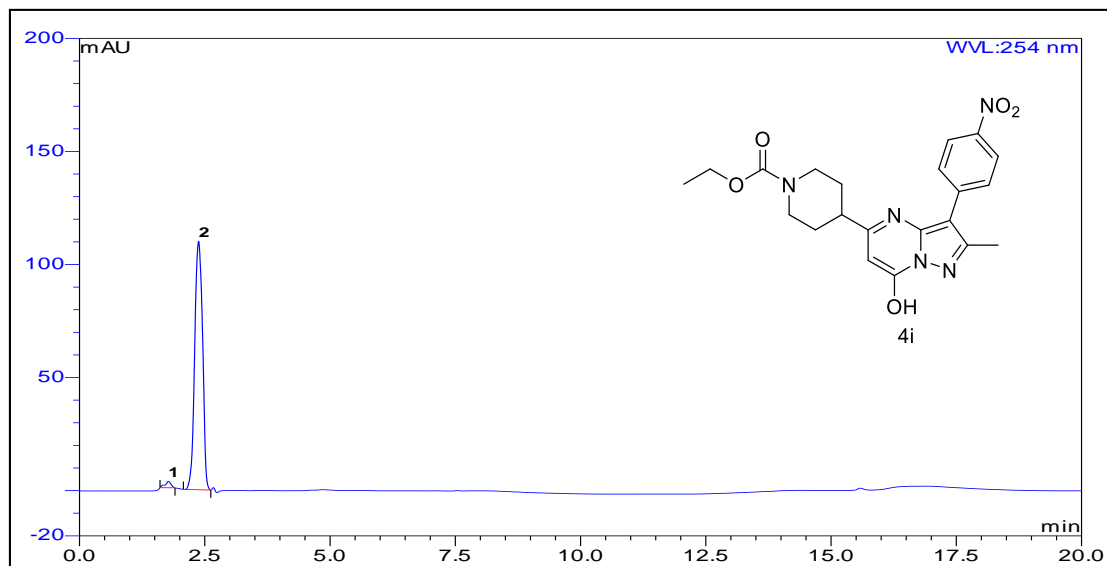

| No.   | Ret. Time min | Height mAU | Area mAU*min | Rel.Area % |
|-------|---------------|------------|--------------|------------|
| 1     | 1.77          | 2.85       | 0.40         | 1.95       |
| 2     | 2.38          | 109.89     | 20.01        | 98.05      |
| Total |               | 112.74     | 20.41        | 100.00     |

### Reversed Phase for 4j (Method A)

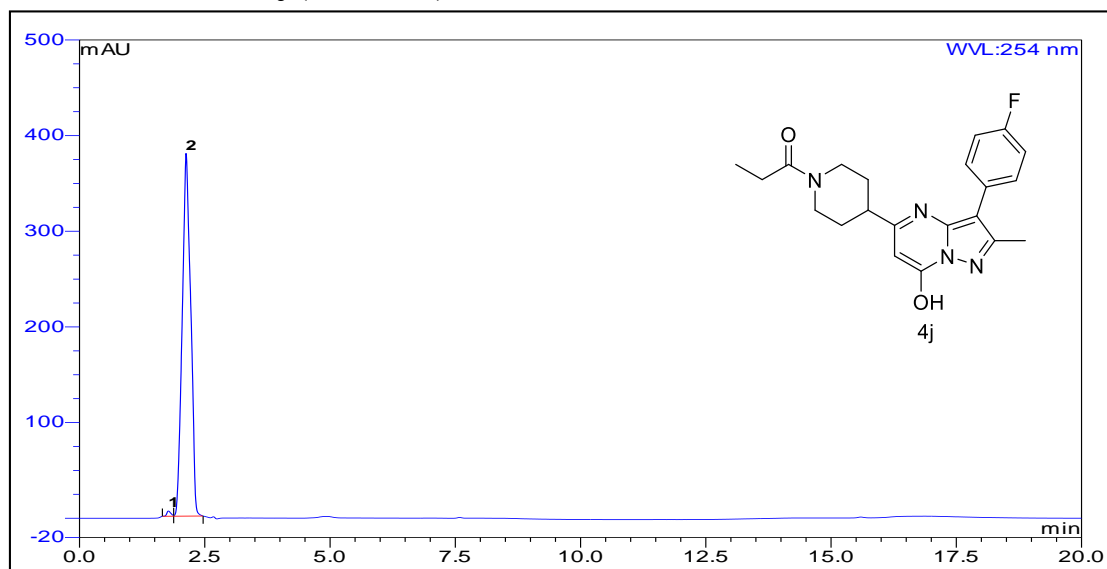

| No.   | Ret. Time min | Height mAU | Area mAU*min | Rel.Area % |
|-------|---------------|------------|--------------|------------|
| 1     | 1.77          | 5.44       | 0.51         | 0.69       |
| 2     | 2.13          | 379.08     | 74.09        | 99.31      |
| Total |               | 384.51     | 74.60        | 100.00     |

### Reversed Phase for 4k (Method A)

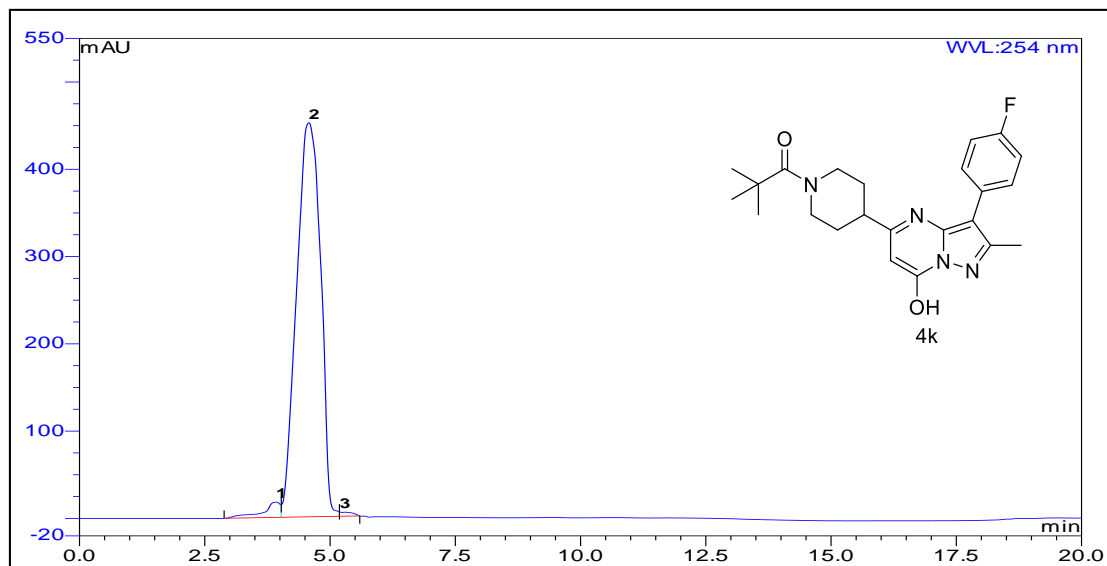

| No.   | Ret. Time<br>min | Height<br>mAU | Area<br>mAU*min | Rel.Area<br>% |
|-------|------------------|---------------|-----------------|---------------|
| 1     | 3.93             | 17.44         | 7.10            | 2.74          |
| 2     | 4.58             | 451.57        | 250.31          | 96.72         |
| 3     | 5.19             | 5.02          | 1.40            | 0.54          |
| Total |                  | 116.30        | 50.57           | 100.00        |

### Reversed Phase for 4l (Method A)

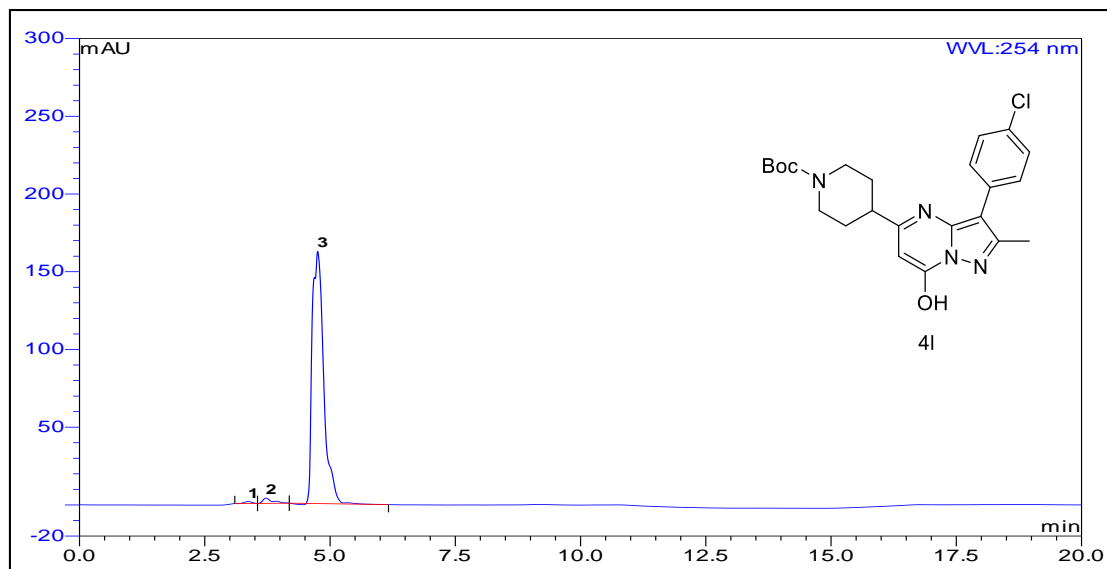

| No.   | Ret. Time<br>min | Height<br>mAU | Area<br>mAU*min | Rel.Area<br>% |
|-------|------------------|---------------|-----------------|---------------|
| 1     | 3.37             | 1.28          | 0.21            | 0.48          |
| 2     | 3.72             | 3.36          | 0.75            | 1.70          |
| 3     | 4.75             | 162.21        | 43.14           | 97.82         |
| Total |                  | 166.85        | 44.10           | 100.00        |



### Reversed Phase for 4m (Method B)

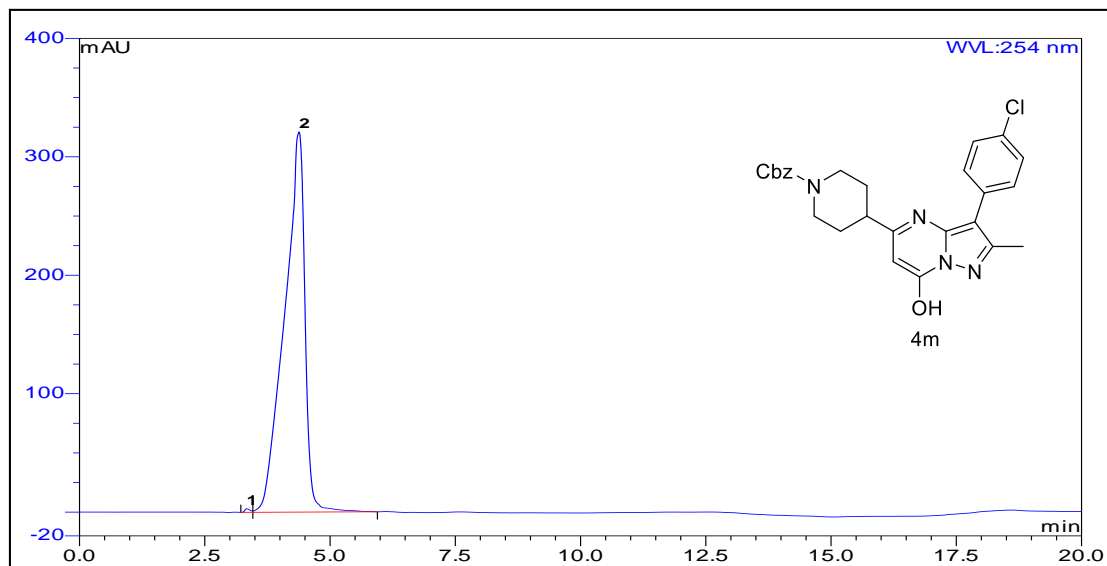

| No.   | Ret. Time min | Height mAU | Area mAU*min | Rel.Area % |
|-------|---------------|------------|--------------|------------|
| 1     | 3.34          | 3.03       | 0.37         | 0.24       |
| 2     | 4.39          | 321.04     | 151.14       | 99.76      |
| Total |               | 324.07     | 151.51       | 100.00     |

### Reversed Phase for 4n (Method A)

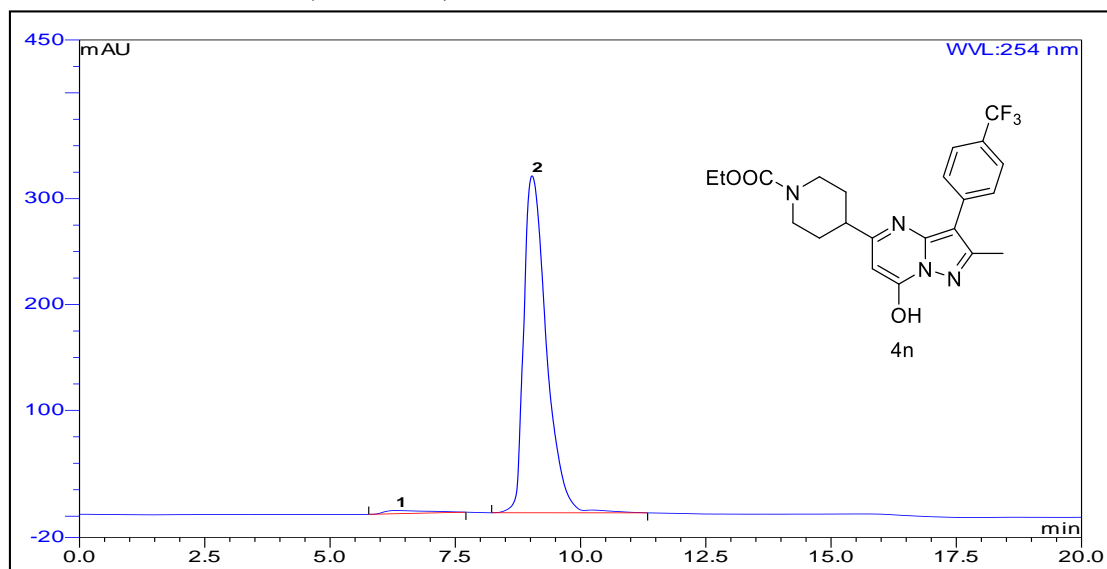

| No.   | Ret. Time min | Height mAU | Area mAU*min | Rel.Area % |
|-------|---------------|------------|--------------|------------|
| 1     | 6.32          | 3.00       | 2.94         | 1.73       |
| 2     | 9.03          | 318.38     | 166.63       | 98.27      |
| Total |               | 321.38     | 169.57       | 100.00     |

### Reversed Phase for **4o** (Method A)

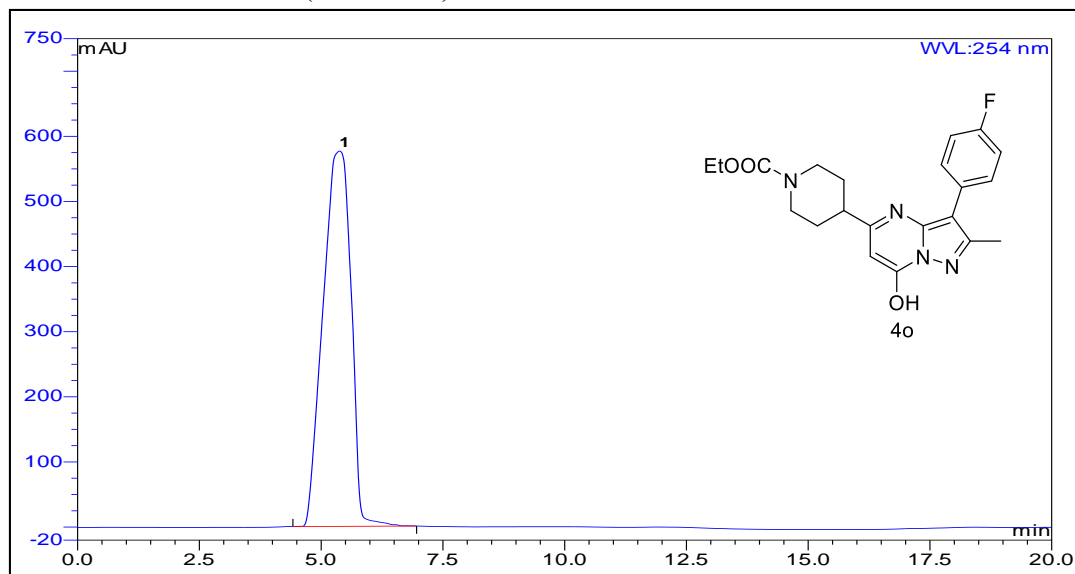

| No.   | Ret. Time min | Height mAU | Area mAU*min | Rel.Area % |
|-------|---------------|------------|--------------|------------|
| 1     | 5.38          | 576.25     | 384.75       | 100        |
| Total |               | 576.25     | 384.75       | 100.00     |

### Reversed Phase for **4p** (Method A)

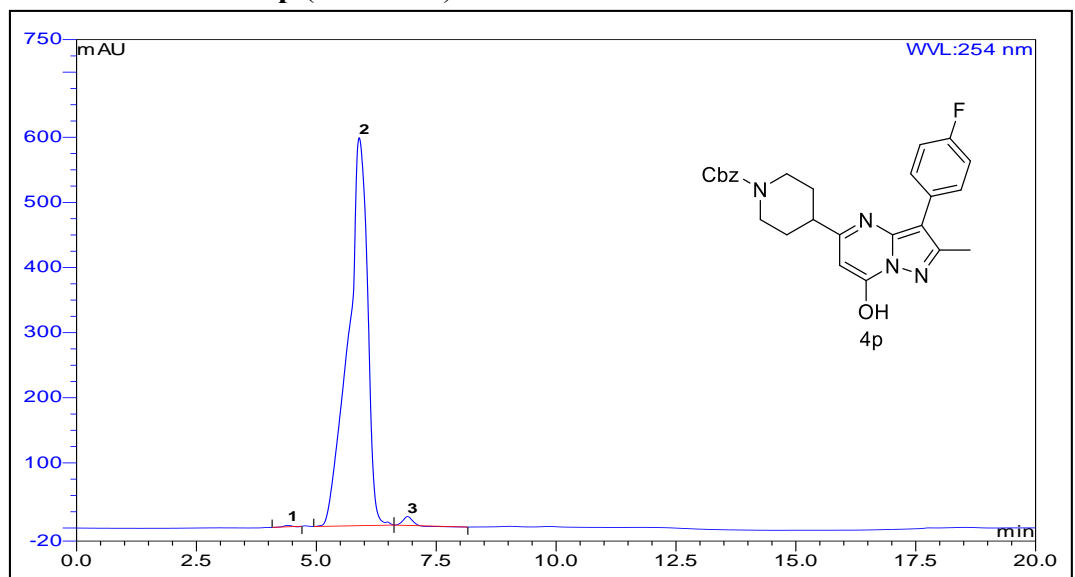

| No.   | Ret. Time min | Height mAU | Area mAU*min | Rel.Area % |
|-------|---------------|------------|--------------|------------|
| 1     | 4.41          | 2.12       | 0.33         | 0.12       |
| 2     | 5.89          | 595.74     | 279.66       | 98.94      |
| 3     | 6.90          | 13.68      | 2.67         | 0.94       |
| Total |               | 166.85     | 282.66       | 100.00     |
